# Supplementary material for: Correlates of uptake of HIV testing among children and young adolescents in Akwa-Ibom state, Nigeria: a secondary data analysis of the Akwa-Ibom aids indicator survey, 2017
Source: Springer Nature journal article supplement (doi:10.1186/s12887-021-02495-5), 2021-01-12
Supplement: MOESM1 [file 18762214]

## AKAIS ADULT INDIVIDUAL QUESTIONNAIRE (ALL Participants ≥15 years of age)

### Contents

|                                                        |    |
|--------------------------------------------------------|----|
| LANGUAGE AND INFORMED CONSENT .....                    | 2  |
| MODULE 1: RESPONDENT BACKGROUND .....                  | 5  |
| MODULE 2: MARRIAGE .....                               | 10 |
| MODULE 3: REPRODUCTIVE HEALTH .....                    | 16 |
| MODULE 4: CHILDREN .....                               | 34 |
| MODULE 5: SEXUAL ACTIVITY .....                        | 48 |
| MODULE 6: HIV/AIDS KNOWLEDGE AND ATTITUDES .....       | 57 |
| MODULE 7: HIV/AIDS TESTING .....                       | 60 |
| MODULE 8: HIV STATUS, CARE AND TREATMENT .....         | 66 |
| MODULE 9: TUBERCULOSIS AND OTHER HEALTH ISSUES .....   | 78 |
| MODULE 10: BLOOD SAFETY AND MEDICAL INJECTIONS .....   | 81 |
| MODULE 11: NON-PRESCRIPTION DRUG USE/ALCOHOL USE ..... | 87 |

## LANGUAGE AND INFORMED CONSENT

| NO. | VARNAME | QUESTIONS                                                                                                                                                                                                 | CODING CATEGORIES | SKIPS/FILTERS     | CORE/SUPPLEMENT | AKDAIS ONLY | NOTES |
|-----|---------|-----------------------------------------------------------------------------------------------------------------------------------------------------------------------------------------------------------|-------------------|-------------------|-----------------|-------------|-------|
| 1   |         | FIRST NAME OF THE PARTICIPANT FROM HOUSEHOLD ROSTER<br><br>CONFIRM NAME WITH PARTICIPANT                                                                                                                  | FIRST NAME: _____ |                   |                 |             |       |
| 2   |         | AGE OF PARTICIPANT FROM HOUSEHOLD ROSTER<br><br>ASK PARTICIPANT: "How old were you at your last birthday?"<br><br><i>IF AGE DIFFERENT FROM HOUSEHOLD ROSTER, PLEASE VERIFY CORRECT AGE OF PARTICIPANT</i> | AGE: _____        | MUST BE >14 YEARS |                 |             |       |
| 3   |         | SCAN BARCODE OF PARTICIPANT                                                                                                                                                                               |                   |                   |                 |             |       |

|   |  |                                                                                                                                                               |                                                                                                                                                               |               |  |  |  |
|---|--|---------------------------------------------------------------------------------------------------------------------------------------------------------------|---------------------------------------------------------------------------------------------------------------------------------------------------------------|---------------|--|--|--|
| 4 |  | RECORD SEX OF THE RESPONDENT                                                                                                                                  | MALE = 1<br>FEMALE = 2                                                                                                                                        |               |  |  |  |
| 5 |  | TO INTERVEIWER: FOLLOW THE NEXT STEPS<br>1) ASSESS ( <b>NAME</b> )'S ELIGIBILITY (LANGUAGE, HEARING ABILITY, COGNATIVE ABILITY)<br>2) Consent ( <b>NAME</b> ) |                                                                                                                                                               |               |  |  |  |
| 6 |  | FOR THE INTERVIEWER, DON'T READ OUT LOUD<br><br>Is ( <b>NAME</b> ) eligible for the survey based on assessment (STEP 1)?                                      | YES = 1<br>NO = 2                                                                                                                                             | IF YES →8     |  |  |  |
| 7 |  | Reason for ineligibility:                                                                                                                                     | HEARING DISABILITY=1<br>DOES NOT SPEAK A LANGUAGE THE SURVEY TEAM CAN ACCOMMODATE=2<br>VISUAL IMPAIRMENT=3<br>COGNITIVE DISABILITY=4<br>OTHER=98<br>(SPECIFY) | END INTERVIEW |  |  |  |
| 8 |  | FROM CONSENT FORM:<br><br>Did you consent to take part?                                                                                                       | YES = 1<br>NO = 2                                                                                                                                             | IF YES, → 10  |  |  |  |

|    |  |                                                                                                            |                                                                                                                                                                                                                                                                                                                                             |               |   |  |  |
|----|--|------------------------------------------------------------------------------------------------------------|---------------------------------------------------------------------------------------------------------------------------------------------------------------------------------------------------------------------------------------------------------------------------------------------------------------------------------------------|---------------|---|--|--|
| 9  |  | <p>What are the reason that you do not want to participate in the survey?</p> <p>SELECT ALL THAT APPLY</p> | <p>NO TIME= 1<br/> NOT COMFORTABLE WITH INTERVIEW= 2<br/> DOESN'T LIKE QUESTIONS ON SEX= 3<br/> DOESN'T LIKE BLOOD DRAW= 4<br/> DOESN'T WANT TO GET RESULTS= 5<br/> WORRIES ABOUT CONFIDENTIALITY= 6<br/> DOESN'T WANT TO BE TESTED FOR HIV=7<br/> ALREADY KNOWS HIV POSITIVE=8<br/> OTHER (SPECIFY)=96</p> <hr/> <p>REFUSES TO SAY= 99</p> | END INTERVIEW |   |  |  |
| 10 |  | <p>What Language do you prefer for our discussion today?</p>                                               | <p>ENGLISH=1<br/> ANNANG=2<br/> IBIBIO=3<br/> ORO=4<br/> PIDGIN=5</p>                                                                                                                                                                                                                                                                       |               | C |  |  |

**MODULE 1: RESPONDENT BACKGROUND**

| NO.                                                                                                                                                          | VARNAM E | QUESTIONS                        | CODING CATEGORIES                                                                                                               | SKIPS/FILTERS | CORE/SUPPLEMENT | AKAIS ONLY | NOTES |
|--------------------------------------------------------------------------------------------------------------------------------------------------------------|----------|----------------------------------|---------------------------------------------------------------------------------------------------------------------------------|---------------|-----------------|------------|-------|
| THANK YOU FOR AGREEING TO PARTICIPATE IN THIS SURVEY. THE FIRST SET OF QUESTIONS IS ABOUT YOUR LIFE IN GENERAL. AFTERWARDS, WE WILL MOVE ON TO OTHER TOPICS. |          |                                  |                                                                                                                                 |               |                 |            |       |
| 101                                                                                                                                                          |          | What is your ethnic group/tribe? | ANNANG=1<br>IBIBIO=2<br>ORON=3<br>EFIK=4<br>YORUBA=5<br>IGBO = 6<br>HAUSA = 7<br>OTHER (SPECIFY) = 96<br>_____                  |               | S               |            |       |
| 102                                                                                                                                                          |          | What is your religion?           | ISLAM= 1<br>CHRISTIAN=2<br>TRADITIONAL= 3<br>NO RELIGION=4<br>OTHER (SPECIFY)=96<br>_____<br>DON'T KNOW=98<br>REFUSED TO SAY=99 |               | S               |            |       |
| 102B                                                                                                                                                         |          | What is your denomination?       | PROTESTANT=1<br>CATHOLIC=2<br>PENTECOSTAL=3                                                                                     |               |                 |            |       |

| NO. | VARNAM<br>E | QUESTIONS                      | CODING CATEGORIES                                              | SKIPS/FILTERS                 | CORE/S<br>UPPLEM<br>ENT | AKAIS<br>ONLY | NOTES |
|-----|-------------|--------------------------------|----------------------------------------------------------------|-------------------------------|-------------------------|---------------|-------|
|     |             |                                | OTHER (SPECIFY)=96<br><hr/> DON'T KNOW=98<br>REFUSED TO SAY=99 |                               |                         |               |       |
| 103 |             | Have you ever attended school? | YES = 1<br>NO = 2<br>DON'T KNOW = 98<br>REFUSED TO SAY = 99    | IF NO, DK,<br>REFUSED<br>→107 | C                       |               |       |
| 104 |             | Are you enrolled in school?    | YES = 1<br>NO = 2<br>DON'T KNOW = 98<br>REFUSED = 99           | IF DK,<br>REFUSED<br>→107     | C                       |               |       |

| NO. | VARNAM E | QUESTIONS                                                                                               | CODING CATEGORIES                                                                                                                                                          | SKIPS/FILTERS                            | CORE/SUPPLEMENT | AKAIS ONLY | NOTES |
|-----|----------|---------------------------------------------------------------------------------------------------------|----------------------------------------------------------------------------------------------------------------------------------------------------------------------------|------------------------------------------|-----------------|------------|-------|
| 105 |          | What is your highest level of education attained?<br>READ ALL RESPONSES ALOUD                           | NONE = 1<br>SOME PRIMARY = 2<br>PRIMARY = 3<br>SOME SECONDARY = 4<br>SECONDARY = 5<br>POST-SECONDARY/TERTIARY = 6<br>QUR'ANIC ONLY=7<br>DON'T KNOW=98<br>REFUSED TO SAY=99 | IF DK,<br>REFUSED<br>→107                | C               |            |       |
| 106 |          | What is the highest class/form you completed at that level?                                             | CLASS/FORM _____<br>DON'T KNOW = 98<br>REFUSED = 99                                                                                                                        | SKIP IF<br>QUR'ANIC<br>SCHOOL            | C               |            |       |
| 107 |          | Have you done any work in the last <u>12 months</u> for which you received cash or in kind as payment?  | YES = 1<br>NO = 2<br>DON'T KNOW=98<br>REFUSED TO SAY=99                                                                                                                    | IF NO, DK<br>REFUSED →<br>NEXT<br>MODULE | C               |            |       |
| 108 |          | Have you done any work in the last <u>seven days</u> for which you received cash or in kind as payment? | YES = 1<br>NO = 2<br>DON'T KNOW=98<br>REFUSED TO SAY=99                                                                                                                    |                                          | C               |            |       |
| 109 |          | What do you do for a living?                                                                            | DIRECTOR/UPPER MANAGEMENT=1<br>OTHER MANAGEMENT=2<br>SALES MANAGER/REPRESENTATIVE/<br>INSURANCE BROKER=3                                                                   |                                          |                 |            |       |

| NO. | VARNAM<br>E | QUESTIONS                                                                                           | CODING CATEGORIES                                                                                                                                                                                                                                                                                                                                                                                      | SKIPS/FILTERS | CORE/S<br>UPPLEM<br>ENT | AKAIS<br>ONLY | NOTES |
|-----|-------------|-----------------------------------------------------------------------------------------------------|--------------------------------------------------------------------------------------------------------------------------------------------------------------------------------------------------------------------------------------------------------------------------------------------------------------------------------------------------------------------------------------------------------|---------------|-------------------------|---------------|-------|
|     |             | PROBE FOR ALL ANSWERS, TICK ALL THAT APPLY                                                          | PROFESSIONAL/SPECIALIST=4<br>SELF EMPLOYED/OWN SMALL BUSINESS=5<br>SELF EMPLOYED (INFORMAL SECTOR /HAWKERS/VENDORS ETC.)=6<br>BLUE COLLAR SKILLED & SEMI SKILLED=7<br>UNSKILLED=8<br>CLERK/CLERICAL=9<br>CIVIL SERVANT=10<br>FARMER/FORESTRY/FISHING/MINING=11<br>HOUSEWIFE=12<br>PENSIONER/RETIRED=13<br>UNEMPLOYED=14<br>STUDENT=15<br>OTHER(SPECIFY)=96<br><hr/> DON'T KNOW=98<br>REFUSED TO SAY=99 |               |                         |               |       |
| 110 |             | How long have you been living in this community?<br><br>IF LESS THAN ONE YEAR, RECORD '00"<br>YEARS | NUMBER. OF YEARS __ __<br><br>ALWAYS = 95<br>VISITOR = 97<br>DON'T KNOW = 98<br>REFUSED TO SAY = 99                                                                                                                                                                                                                                                                                                    |               |                         |               |       |



| NO. | VARNAM<br>E | QUESTIONS                                                                     | CODING CATEGORIES                                               | SKIPS/FILTERS    | CORE/S<br>UPPLEM<br>ENT | AKAIS<br>ONLY | NOTES |
|-----|-------------|-------------------------------------------------------------------------------|-----------------------------------------------------------------|------------------|-------------------------|---------------|-------|
| 111 |             | In the last 12 months, have you travelled to anywhere outside your community? | YES=1<br>NO=2<br>DON'T KNOW = 98<br>REFUSED TO SAY = 99         | IF NO→201        |                         |               |       |
| 112 |             | How many times did you travel and slept away in the last 12 months?           | NUMBER OF TIMES__<br><br>DON'T KNOW = 98<br>REFUSED TO SAY = 99 |                  |                         |               |       |
| 113 |             | How many of these trips were you gone for one month or greater?               | NUMBER OF TIMES__<br><br>DON'T KNOW = 98<br>REFUSED TO SAY = 99 | CAN'T BE<br>>112 |                         |               |       |

**MODULE 2: MARRIAGE**

| NO.                                                                                                                    | VARNAME | QUESTIONS                                                                                                                          | CODING CATEGORIES                                                                                                             | SKIPS/FILTERS                                           | CORE/SUPPLEMENT | AKAIS ONLY | NOTES |
|------------------------------------------------------------------------------------------------------------------------|---------|------------------------------------------------------------------------------------------------------------------------------------|-------------------------------------------------------------------------------------------------------------------------------|---------------------------------------------------------|-----------------|------------|-------|
| <b>[INTERVIEWER READ]:</b> NOW I WOULD LIKE TO ASK YOU ABOUT YOUR CURRENT AND PREVIOUS RELATIONSHIPS AND/OR MARRIAGES. |         |                                                                                                                                    |                                                                                                                               |                                                         |                 |            |       |
| 201                                                                                                                    |         | Have you ever been married or lived with a partner as if married?                                                                  | YES = 1<br>NO = 2<br>REFUSED TO SAY = 99                                                                                      | IF NO,<br>REFUSED →<br>301                              | C               |            |       |
| 202                                                                                                                    |         | At what age were you first married?                                                                                                | AGE AT MARRIAGE: ____ ____<br>DON'T KNOW = 98<br>REFUSED TO SAY = 99                                                          |                                                         | S               |            |       |
| 203                                                                                                                    |         | Have you ever been widowed? That is, did a spouse ever pass away while you were still married or living with them?                 | YES = 1<br>NO = 2<br>REFUSED TO SAY = 99                                                                                      |                                                         | S               |            |       |
| 204                                                                                                                    |         | What is your current marital status? Are you married, living together with someone as if married, widowed, divorced, or separated? | MARRIED = 1<br>LIVING WITH A PARTNER AS IF MARRIED = 2<br>WIDOWED = 3<br>DIVORCED = 4<br>SEPARATED = 5<br>REFUSED TO SAY = 99 | WIDOWED,<br>DIVORCED,<br>SEPARATED,<br>REFUSED →<br>301 | C               |            |       |

| NO.                                                                                                           | VARNAME | QUESTIONS                                                                                                                                                                                                                                                            | CODING CATEGORIES                                           | SKIPS/FILTERS                                                | CORE/SU<br>PPLEMEN<br>T | AKAIS<br>ONLY | NOTES |
|---------------------------------------------------------------------------------------------------------------|---------|----------------------------------------------------------------------------------------------------------------------------------------------------------------------------------------------------------------------------------------------------------------------|-------------------------------------------------------------|--------------------------------------------------------------|-------------------------|---------------|-------|
| <b>[INTERVIEWER READ]:</b> NOW I WOULD LIKE TO ASK YOU SEVERAL QUESTIONS ABOUT YOUR CURRENT SPOUSE OR PARTNER |         |                                                                                                                                                                                                                                                                      |                                                             |                                                              |                         |               |       |
| 205                                                                                                           |         | How many wives do you have?                                                                                                                                                                                                                                          | NO. OF WIVES: __ __<br>REFUSED TO SAY = 99                  | IF REFUSED<br>→ 301<br><br>MALES ONLY.<br>SKIP FEMALE        | C                       |               |       |
| 206                                                                                                           |         | How many wives does your husband have?                                                                                                                                                                                                                               | NO. OF WIVES: __ __<br>DON'T KNOW=98<br>REFUSED TO SAY = 99 | IF 1, DK,<br>REFUSED →<br>210<br><br>FEMALES<br>ONLY         |                         |               |       |
| 207                                                                                                           |         | The Household Schedule listed [INSERT NUMBER OF REPORTED PARTNERS] household members as your wives/partners. Are all of the listed household members your wives/partners who live in the household?<br><br>Interviewer: confirm the number from the household roster | YES = 1<br>NO = 2<br>REFUSED TO SAY = 99                    | IF NO,<br>REFUSED<br>→209<br>MALES ONLY<br>SKIP IF<br>FEMALE | C                       |               |       |

| NO. | VARNAME | QUESTIONS                                                              | CODING CATEGORIES                        | SKIPS/FILTERS                                                | CORE/SU<br>PPLEMEN<br>T | AKAIS<br>ONLY | NOTES |
|-----|---------|------------------------------------------------------------------------|------------------------------------------|--------------------------------------------------------------|-------------------------|---------------|-------|
|     |         | SCAN THE BARCODE OF THE WIFE FROM THE HOUSEHOLD LISTING                |                                          |                                                              |                         |               |       |
| 208 |         | Is [NAME] your wife/partner?<br><br>REPEAT FOR EACH WIFE/PARTNER       | YES = 1<br>NO = 2<br>REFUSED TO SAY = 99 | MALES ONLY<br>SKIP IF<br>FEMALE                              | C                       |               |       |
| 209 |         | Does [NAME] live in the household?<br><br>REPEAT FOR EACH WIFE/PARTNER | YES = 1<br>NO = 2<br>REFUSED TO SAY = 99 | MALES ONLY<br>SKIP IF<br>FEMALE                              | C                       |               |       |
| 210 |         | Do you have additional spouse(s)/partner(s) that live with you?        | YES = 1<br>NO = 2<br>REFUSED TO SAY = 99 | IF NO,<br>REFUSED<br>→212<br>MALES ONLY<br>SKIP IF<br>FEMALE | C                       |               |       |
| 211 |         | How many additional spouse(s)/partners(s) live with you?               | NUMBER OF SPOUSES OR LIVE-IN PARTNERS __ | MALES ONLY<br>SKIP IF<br>FEMALE                              | C                       |               |       |

| NO. | VARNAME | QUESTIONS                                                                  | CODING CATEGORIES                                                                        | SKIPS/FILTERS                                                                                              | CORE/SU<br>PPLEMEN<br>T | AKAIS<br>ONLY | NOTES |
|-----|---------|----------------------------------------------------------------------------|------------------------------------------------------------------------------------------|------------------------------------------------------------------------------------------------------------|-------------------------|---------------|-------|
| 212 |         | What is the name of your spouse/partner that lives with you?               | NAME OF SPOUSE/PARTNER ____<br>DON'T KNOW = 98<br>REFUSED = 99                           | MALES ONLY<br>SKIP IF<br>FEMALE                                                                            | C                       |               |       |
| 213 |         | Do you have additional spouse(s)/partner(s) that live elsewhere?           | YES = 1<br>NO = 2<br>REFUSED TO SAY = 99                                                 | IF NO,<br>REFUSED<br>→301<br>MALES ONLY<br>SKIP IF<br>FEMALE                                               |                         | Y             |       |
| 214 |         | How many wives or live-in partners do you have who live elsewhere?         | NUMBER OF ADDITIONAL<br>SPOUSE(S)/PARTNERS ____<br>DON'T KNOW = 98<br>REFUSED = 99       | MALES ONLY<br>SKIP IF<br>FEMALE<br><br>CANNOT BE<br>>205                                                   | C                       |               |       |
| 215 |         | Is your husband or partner living with you now or is he staying elsewhere? | LIVING TOGETHER = 1<br>STAYING ELSEWHERE = 2<br>DON'T KNOW = 98<br>REFUSE TO ANSWER = 99 | IF STAYING<br>ELSEWHERE,<br>DK, REFUSED<br>→218<br><br>IF LIVING<br>TOGETHER &<br>LISTED IN HH<br>SCHEDULE | C                       |               |       |

| NO. | VARNAME | QUESTIONS                                                                                                            | CODING CATEGORIES                                           | SKIPS/FILTERS                                                      | CORE/SU<br>PPLEME<br>NT | AKAIS<br>ONLY | NOTES |
|-----|---------|----------------------------------------------------------------------------------------------------------------------|-------------------------------------------------------------|--------------------------------------------------------------------|-------------------------|---------------|-------|
|     |         |                                                                                                                      |                                                             | →215<br><br>FEMALES<br>ONLY<br>SKIP IF MALE                        |                         |               |       |
|     |         | SCAN THE BARCODE OF THE HUSBAND FROM THE HOUSEHOLD LISTING                                                           |                                                             |                                                                    |                         |               |       |
| 216 |         | The household schedule listed [NAME OF HUSBAND/PARTNER] as your husband/partner who is living here. Is that correct? | YES=1<br>NO=2<br>DON'T KNOW = 98<br>REFUSED TO SAY = 99     | IF YES, DK,<br>REFUSED →<br>218<br>FEMALES<br>ONLY<br>SKIP IF MALE | C                       |               |       |
| 217 |         | Is your spouse/partner that lives with you on the HH roster?                                                         | LISTED ON THE HH ROSTER = 1<br>NOT LISTED IN HOUSEHOLD = 96 | IF LISTED →<br>218<br>FEMALES<br>ONLY<br>SKIP IF MALE              | C                       |               |       |
|     |         | SCAN THE BARCODE OF THE SPOUSE/PARTNER FROM THE HOUSEHOLD LISTING                                                    |                                                             |                                                                    |                         |               |       |

| NO. | VARNAME | QUESTIONS                                                                                     | CODING CATEGORIES                                              | SKIPS/FILTERS                                                        | CORE/SUPPLEMENT | AKAIS ONLY | NOTES |
|-----|---------|-----------------------------------------------------------------------------------------------|----------------------------------------------------------------|----------------------------------------------------------------------|-----------------|------------|-------|
| 218 |         | What is the name of your spouse/partner that lives with you?                                  | NAME OF SPOUSE/PARTNER ____<br>DON'T KNOW = 98<br>REFUSED = 99 | FEMALES ONLY<br>SKIP IF MALE                                         | C               |            |       |
| 219 |         | Does your husband or partner have other wives or does he live with other women as if married? | YES=1<br>NO=2<br>DON'T KNOW = 98<br>REFUSED TO SAY = 99        | IF NO, DK,<br>REFUSED<br>→301<br><br>FEMALES<br>ONLY<br>SKIP IF MALE | C               |            |       |
| 220 |         | Including yourself, how many wives does your husband have?                                    | NO. OF WIVES: ____<br>DON'T KNOW=98<br>REFUSED TO SAY = 99     | FEMALES<br>ONLY<br>SKIP IF MALE                                      | C               |            |       |

**MODULE 3: REPRODUCTIVE HEALTH**

| NO.                                                                                                       | VARNAME | QUESTIONS                                                                                                                                                                   | CODING CATEGORIES                                               | SKIPS/FILTERS              | CORE/SUPPLEMENT | KADAIS ONLY | NOTES |
|-----------------------------------------------------------------------------------------------------------|---------|-----------------------------------------------------------------------------------------------------------------------------------------------------------------------------|-----------------------------------------------------------------|----------------------------|-----------------|-------------|-------|
| <b>[INTERVIEWER READ]:</b> NOW I WOULD LIKE TO ASK YOU QUESTIONS ABOUT YOUR PREGNANCIES AND YOUR CHILDREN |         |                                                                                                                                                                             |                                                                 | IF MALE → 354              |                 |             |       |
| 301                                                                                                       |         | How many times have you been pregnant?<br>Include current pregnancy<br><br>CODE '00' IF NONE.                                                                               | TIME(S) ____<br>NONE = 00<br>REFUSED TO SAY = 99                | IF NONE, REFUSED<br>→ 354  | C               |             |       |
| 302                                                                                                       |         | Have you ever had a pregnancy that resulted in a live birth?<br><br>A live birth is when the baby shows signs of life, such as breathing, beating of the heart or movement. | YES = 1<br>NO = 2<br>REFUSED TO SAY = 99                        | IF NO, REFUSED<br>→ 354    | C               |             |       |
| 303                                                                                                       |         | How many children have you given birth to in the last three years?<br><br>This includes babies that were born alive but later died.                                         | NUMBER OF BABIES ____<br>DON'T KNOW = 98<br>REFUSED TO SAY = 99 | IF ZERO, DK, REFUSED → 354 | C               |             |       |



| NO.                                                                                                                                                                                                 | VARNAME | QUESTIONS                                                                                                                                                                                                                                   | CODING CATEGORIES                                                                                                                          | SKIPS/FIL-TERS                   | CORE/SUPPLE-MENT | KADAIS ONLY | NOTES |
|-----------------------------------------------------------------------------------------------------------------------------------------------------------------------------------------------------|---------|---------------------------------------------------------------------------------------------------------------------------------------------------------------------------------------------------------------------------------------------|--------------------------------------------------------------------------------------------------------------------------------------------|----------------------------------|------------------|-------------|-------|
| <p>NOW I WOULD LIKE TO ASK YOU SOME QUESTIONS ABOUT THE LAST PREGNANCY THAT RESULTED IN A LIVE BIRTH WITH IN THE LAST THREE YEARS.</p> <p>SKIP TO 354 IF NO LIVE BIRTH IN THE LAST THREE YEARS.</p> |         |                                                                                                                                                                                                                                             |                                                                                                                                            |                                  |                  |             |       |
| 304                                                                                                                                                                                                 |         | Did your last pregnancy result in birth to twins or more?                                                                                                                                                                                   | YES = 1<br>NO = 2<br>REFUSED TO SAY = 99                                                                                                   |                                  |                  |             |       |
| 305                                                                                                                                                                                                 |         | <p>What is the NAME of the baby/babies you delivered in your last pregnancy?</p> <p>IF MULTIPLE BIRTH, LIST THE NAMES OF TWINS AND TRIPLETS. IF THE CHILD WAS NOT NAMED BEFORE DEATH, INPUT BIRTH 1 (BIRTH 2, BIRTH 3 FOR MULTIPLE) ETC</p> | INITIALS _____<br>INITIALS _____<br>INITIALS _____                                                                                         |                                  |                  |             |       |
| 306                                                                                                                                                                                                 |         | When did you give birth to <b>(NAME)</b> ?                                                                                                                                                                                                  | DATE:<br>DAY __ __<br>DON'T KNOW = 98<br>REFUSED TO SAY = 99<br><br>MONTH __ __<br>DON'T KNOW = 98<br>REFUSED = 99<br><br>YEAR __ __ __ __ | MUST < 3 YEARS FROM TODAY'S DATE |                  | Y           |       |

|     |  |                                                                                                              |                                                |                                                   |   |  |  |
|-----|--|--------------------------------------------------------------------------------------------------------------|------------------------------------------------|---------------------------------------------------|---|--|--|
|     |  |                                                                                                              | DON'T KNOW =9998<br>REFUSED TO SAY = 9999      |                                                   |   |  |  |
| 307 |  | How old was <b>(NAME)</b> at his/her last birthday?<br>RECORD AGE IN YEARS<br>IF LESS THAN 1 YEAR, CODE '00' | YEARS ____<br>DON'T KNOW = 98<br>REFUSED = 99  | LESS THAN<br>4 YEARS                              |   |  |  |
| 308 |  | Is <b>(INITIALS)</b> still alive?                                                                            | YES = 1<br>NO = 2<br>REFUSED TO SAY = 99       | REPEAT<br>FOR MUL-<br>TIPLES<br><br>IF<br>YES→311 | C |  |  |
| 309 |  | How old was (NAME) when he/she died?                                                                         | YEARS ____<br>DON'T KNOW = 98<br>REFUSED = 99  | REPEAT<br>FOR<br>MULTI-<br>PLES                   |   |  |  |
| 310 |  | How old was (NAME) in months when he/she died?                                                               | MONTHS ____<br>DON'T KNOW = 98<br>REFUSED = 99 | REPEAT<br>FOR<br>MULTI-<br>PLES                   |   |  |  |
| 311 |  | Is <b>(INITIALS)</b> a boy or a girl?                                                                        | BOY(S)=1<br>GIRL(S)=2<br>REFUSED TO SAY = 99   | REPEAT<br>FOR MUL-<br>TIPLES                      |   |  |  |

|     |  |                                                                                        |                                                             |                                                                                                 |  |  |  |
|-----|--|----------------------------------------------------------------------------------------|-------------------------------------------------------------|-------------------------------------------------------------------------------------------------|--|--|--|
| 312 |  | Is <b>(INITIALS)</b> living with you?                                                  | YES = 1<br>NO = 2<br>REFUSED = 99                           | REPEAT<br>FOR MUL-<br>TIPLES<br><br>ONLY IF<br>BABY IS<br>ALIVE<br>FROM 308<br><br>IF<br>NO→314 |  |  |  |
| 313 |  | SCAN THE BARCODE FROM THE HOUSEHOLD ROSTER                                             |                                                             |                                                                                                 |  |  |  |
| 314 |  | Were you ever tested for HIV before your pregnancy with <b>(NAME)</b> ?                | YES = 1<br>NO = 2<br>DON'T KNOW = 98<br>REFUSED TO SAY = 99 | IF NO, DK,<br>REFUSED<br>→ 317                                                                  |  |  |  |
| 315 |  | Did you test positive for HIV before your pregnancy with <b>(NAME)</b> ?               | YES = 1<br>NO = 2<br>DON'T KNOW = 98<br>REFUSED TO SAY = 99 | IF NO, DK,<br>REFUSED<br>→ 317                                                                  |  |  |  |
| 316 |  | Were you taking ARVs or HIV medications, before you were pregnant with <b>(NAME)</b> ? | YES = 1<br>NO = 2<br>DON'T KNOW = 98<br>REFUSED TO SAY = 99 |                                                                                                 |  |  |  |

|     |  |                                                                                                                                                                          |                                                                                                                                                                                                                                                                                                                                                                                                                               |                                       |   |  |  |
|-----|--|--------------------------------------------------------------------------------------------------------------------------------------------------------------------------|-------------------------------------------------------------------------------------------------------------------------------------------------------------------------------------------------------------------------------------------------------------------------------------------------------------------------------------------------------------------------------------------------------------------------------|---------------------------------------|---|--|--|
| 317 |  | When you were pregnant with <b>(NAME)</b> , did you go to a health facility for antenatal care (ANC)?                                                                    | YES = 1<br>NO = 2<br>DON'T KNOW = 98<br>REFUSED TO SAY = 99                                                                                                                                                                                                                                                                                                                                                                   | IF YES<br>→319                        | C |  |  |
| 318 |  | What was your <u>main</u> reason for not attending antenatal care when you were pregnant with <b>(NAME)</b> ?<br><br>SELECT ONLY ONE OPTION<br>PROBE FOR THE MAIN REASON | THE CLINIC IS TOO FAR AWAY = 1<br>COULD NOT TAKE TIME OFF WORK/TOO BUSY = 2<br>COULD NOT AFFORD TO PAY FOR THE VISIT = 3<br>DID NOT TRUST THE CLINIC STAFF = 4<br>RECEIVED CARE AT HOME = 5<br>DID NOT WANT AN HIV TEST DONE = 6<br>HUSBAND/FAMILY WOULD NOT LET ME GO = 7<br>USED TRADITIONAL BIRTH ATTENDANT = 8<br>POOR CLINICAL SERVICES =9<br>OTHER (SPECIFY)= 96<br><br>_____<br>DON'T KNOW = 98<br>REFUSED TO SAY = 99 | → 334                                 | C |  |  |
| 319 |  | At what month in your pregnancy did you start attending the antenatal clinic?                                                                                            | 1-3 MONTHS/1ST TRIMESTER = 1<br>4-6 MONTHS/2ND TRIMESTER = 2<br>7-9 MONTHS/3RD TRIMESTER = 3<br>DON'T REMEMBER/DON'T KNOW = 98<br>REFUSED TO SAY = 99                                                                                                                                                                                                                                                                         | USE AIDS<br>TO HELP<br>DEFINE<br>TIME | S |  |  |
| 320 |  | What type of clinic did you go for antenatal care when you were pregnant with <b>(NAME)</b> ?                                                                            | PUBLIC CLINIC/HOSPITAL= 1<br>PRIVATE CLINIC/HOSPITAL = 2                                                                                                                                                                                                                                                                                                                                                                      |                                       | S |  |  |

|     |  |                                                                                                                                                                                  |                                                                                                                                                                                                                                                                                                                              |                                                      |                 |  |  |
|-----|--|----------------------------------------------------------------------------------------------------------------------------------------------------------------------------------|------------------------------------------------------------------------------------------------------------------------------------------------------------------------------------------------------------------------------------------------------------------------------------------------------------------------------|------------------------------------------------------|-----------------|--|--|
|     |  |                                                                                                                                                                                  | FAITH BASED CLINIC/HOSPITAL=3<br>DON'T KNOW = 98<br>REFUSED TO SAY = 99                                                                                                                                                                                                                                                      |                                                      |                 |  |  |
| 321 |  | During your visits to the antenatal care clinic when you were pregnant with <b>(NAME)</b> , were you <u>offered</u> HIV testing and counselling?                                 | YES = 1<br>NO = 2<br>DON'T KNOW = 98<br>REFUSED TO SAY = 99                                                                                                                                                                                                                                                                  | IF NO, DK,<br>REFUSE<br>→323                         | C               |  |  |
| 322 |  | Were you <u>tested</u> for HIV during any of your antenatal clinic visits when you were pregnant with <b>(NAME)</b> ?                                                            | YES = 1<br>NO = 2<br>DON'T KNOW = 98<br>REFUSED TO SAY = 99                                                                                                                                                                                                                                                                  | IF YES<br>→324                                       | C               |  |  |
| 323 |  | What was the <u>main</u> reason you were not tested for HIV during antenatal care/maternity services with <b>(NAME)</b> ?<br><br>SELECT ONLY ONE OPTION<br>PROBE FOR MAIN REASON | DID NOT WANT AN HIV TEST DONE/DON'T WANT TO KNOW MY STATUS = 1<br>DID NOT RECEIVE PERMISSION FROM SPOUSE/FAMILY = 2<br>AFRAID OTHERS WILL KNOW ABOUT TEST RESULTS = 3<br>DON'T NEED TEST/LOW RISK = 4<br>TEST NOT DONE AT CLINIC=5<br>HIV POSITIVE=6<br>OTHER (SPECIFY) = 96<br><br>_____<br>DON'T KNOW = 98<br>REFUSED = 99 | IF HIV POSITIVE<br>→327<br><br>ANYTHING ELSE<br>→330 |                 |  |  |
| 324 |  | Did you receive the results?                                                                                                                                                     | YES = 1<br>NO = 2<br>DON'T KNOW = 98                                                                                                                                                                                                                                                                                         | IF NO, DK,<br>REFUSED<br>→326                        | C-MODI-<br>FIED |  |  |

|     |  |                                                                                                                                             |                                                                                                                                                                            |                                                                  |            |  |  |
|-----|--|---------------------------------------------------------------------------------------------------------------------------------------------|----------------------------------------------------------------------------------------------------------------------------------------------------------------------------|------------------------------------------------------------------|------------|--|--|
|     |  |                                                                                                                                             | REFUSED TO SAY = 99                                                                                                                                                        |                                                                  |            |  |  |
| 325 |  | What were the results of the last HIV test you received during your pregnancy with <b>(NAME)</b> ?                                          | POSITIVE = 1<br>NEGATIVE = 2<br>UNKNOWN = 3<br>DON'T KNOW = 98<br>REFUSED TO SAY = 99                                                                                      |                                                                  | C-MODIFIED |  |  |
| 326 |  | Where were you tested for HIV during your pregnancy with <b>(NAME)</b> ?<br><br>SELECT ALL THAT APPLY<br>PROBE FOR SPECIFIC TYPE OF SERVICE | ANC CLINIC = 1<br>LABOUR ROOM=2<br>LABORATORY=3<br>VOLUNTARY COUNSELING AND TESTING (VCT) CENTER = 4<br>OTHER (SPECIFY) = 96<br><br>DON'T KNOW = 98<br>REFUSED TO SAY = 99 |                                                                  | S          |  |  |
| 327 |  | Did you get ARVs or HIV medications during your pregnancy to stop <b>(NAME)</b> from getting HIV?                                           | YES = 1<br>NO = 2<br>DON'T KNOW = 98<br>REFUSED TO SAY = 99                                                                                                                | HIV POSITIVE ONLY FROM 315 OR 325 (OPTION 1)<br><br>IF YES → 329 | CC         |  |  |

|                      |  |                                                                                                                                                                                                      |                                                                                                                                                                                                                                                                                                                                                        |                                     |            |  |  |
|----------------------|--|------------------------------------------------------------------------------------------------------------------------------------------------------------------------------------------------------|--------------------------------------------------------------------------------------------------------------------------------------------------------------------------------------------------------------------------------------------------------------------------------------------------------------------------------------------------------|-------------------------------------|------------|--|--|
| 328                  |  | <p>What was the <u>main</u> reason you did not get ARVs or HIV medicines for your own health while you were pregnant with <b>(NAME)</b>?</p> <p>SELECT ONLY ONE OPTION<br/>PROBE FOR MAIN REASON</p> | <p>HUSBAND/FAMILY DID NOT AGREE=1<br/>HEALTH CARE PROVIDER DID NOT PRE-SCRIBE = 2<br/>I FEEL HEALTHY/NOT SICK = 3<br/>COST OF MEDICATIONS = 4<br/>COST OF TRANSPORT = 5<br/>RELIGIOUS REASONS = 6<br/>TAKING TRADITIONAL MEDICATIONS = 7<br/>I DIDN'T ACCEPT STATUS=8<br/>OTHER (SPECIFY) =96</p> <hr/> <p>DON'T KNOW = 98<br/>REFUSED TO SAY = 99</p> | → 330                               | C          |  |  |
| 329                  |  | <p>At what month in your pregnancy were you when you started taking ARVs or HIV medicine?</p>                                                                                                        | <p>MONTHS 1-3/1<sup>ST</sup> TRIMESTER = 1<br/>MONTHS 4-6/2<sup>ND</sup> TRIMESTER = 2<br/>MONTHS 7-9/3<sup>RD</sup> TRIMESTER = 3<br/>DON'T KNOW = 98<br/>REFUSED = 99</p>                                                                                                                                                                            |                                     | S-MODIFIED |  |  |
| SUBSECTION: SYPHILIS |  |                                                                                                                                                                                                      |                                                                                                                                                                                                                                                                                                                                                        |                                     |            |  |  |
| 330                  |  | <p>Were you offered a test for syphilis during your ANC visits for <b>(NAME)</b>?</p>                                                                                                                | <p>YES = 1<br/>NO = 2<br/>DON'T KNOW = 98<br/>REFUSED TO SAY = 99</p>                                                                                                                                                                                                                                                                                  | <p>IF NO, DK, REFUSED<br/>→ 334</p> | S          |  |  |

|                           |  |                                                                               |                                                                                                              |                                                 |   |  |  |
|---------------------------|--|-------------------------------------------------------------------------------|--------------------------------------------------------------------------------------------------------------|-------------------------------------------------|---|--|--|
| 331                       |  | Were you tested for syphilis during your ANC visits for <b>(NAME)</b> ?       | YES = 1<br>NO = 2<br>DON'T KNOW = 98<br>REFUSED TO SAY = 99                                                  | IF NO, DK,<br>REFUSED<br>→ 334                  | S |  |  |
| 332                       |  | Did you test positive for syphilis during your pregnancy with <b>(NAME)</b> ? | YES = 1<br>NO = 2<br>DID NOT GET RESULT = 3<br>DON'T KNOW = 98<br>REFUSED TO SAY = 99                        | IF NO, DK,<br>REFUSED<br>→ 334                  | S |  |  |
| 333                       |  | Did you get treatment for syphilis during your pregnancy with <b>(NAME)</b> ? | YES = 1<br>NO = 2<br>DON'T KNOW = 98<br>REFUSED TO SAY = 99                                                  |                                                 | S |  |  |
| SUBSECTION: TIME IN LABOR |  |                                                                               |                                                                                                              |                                                 |   |  |  |
| 334                       |  | Where did you give birth to <b>(NAME)</b> ?                                   | AT A HEALTH FACILITY = 1<br>AT HOME = 2<br>AT CHURCH=3<br>OTHER (SPECIFY) = 96<br><hr/> REFUSED TO SAY = 99. | IF HOME,<br>CHURCH,<br>OTHER,<br>REFUSE<br>→341 | C |  |  |
| 335                       |  | Were you offered an HIV test during labor?                                    | YES = 1<br>NO = 2<br>ALREADY POSITIVE = 3                                                                    | IF NO, DK,<br>REFUSED<br>→341                   |   |  |  |



|     |  |                                    |                                                                                                                      |                                                                                                  |  |  |  |
|-----|--|------------------------------------|----------------------------------------------------------------------------------------------------------------------|--------------------------------------------------------------------------------------------------|--|--|--|
|     |  |                                    | DON'T KNOW = 98<br>REFUSED TO SAY = 99                                                                               | IF AL-READY POSITIVE<br>→ 338                                                                    |  |  |  |
| 336 |  | Did you test for HIV during labor? | YES = 1<br>NO = 2<br>DON'T KNOW = 98<br>REFUSED TO SAY = 99                                                          | IF HIV POSITIVE FROM 315 OR 325 THEN SKIP TO<br>→ 339<br><br>IF NO, DON'T KNOW, REFUSED<br>→ 341 |  |  |  |
| 337 |  | What was the result of that test?  | POSITIVE = 1<br>NEGATIVE = 2<br>UNKNOWN = 3<br>DID NOT RECEIVE RESULTS = 4<br>DON'T KNOW = 98<br>REFUSED TO SAY = 99 | IF 2, 3, 4, 98,99<br>→341<br><br>IF HIV POSITIVE FROM 315 OR 325 THEN SKIP TO<br>→ 339           |  |  |  |

|     |  |                                                                        |                                                                                                  |                                                                                                         |   |  |  |
|-----|--|------------------------------------------------------------------------|--------------------------------------------------------------------------------------------------|---------------------------------------------------------------------------------------------------------|---|--|--|
| 338 |  | During labor, were you offered ARVs to protect <b>(NAME)</b> from HIV? | YES = 1<br>NO = 2<br>DON'T KNOW = 98<br>REFUSED TO SAY = 99                                      | IF NO, DK, RE-FUSED → 341<br><br>ASK ONLY IF HIV POSITIVE FROM 315 OR 325 OR 337                        |   |  |  |
| 339 |  | During labor, did you take ARVs or HIV medications?                    | YES = 1<br>NO, DID NOT TAKE = 2<br>NO, NOT OFFERED = 3<br>DON'T KNOW = 98<br>REFUSED TO SAY = 99 | IF NO, DK, RE-FUSED → 341<br><br>INCLUDE GRAPHIC OF ARVS.<br><br>IF HIV POSITIVE FROM 315 OR 325 OR 337 | C |  |  |
| 340 |  | Did you continue to take the ARVs or HIV medications after labor?      | YES = 1<br>NO = 2<br>DON'T KNOW = 98<br>REFUSED TO SAY = 99                                      | IF HIV POSITIVE FROM 315 OR 325 OR 337                                                                  | C |  |  |

| SUBSECTION: AFTER BIRTH |  |                                                                                                                                                     |                                                                                       |                                                                              | C |  |  |
|-------------------------|--|-----------------------------------------------------------------------------------------------------------------------------------------------------|---------------------------------------------------------------------------------------|------------------------------------------------------------------------------|---|--|--|
| 341                     |  | Did <b>(NAME)</b> take any ARVs or HIV medications to stop him/her from getting HIV infection? This would be before <b>(NAME'S)</b> first HIV test. | YES = 1<br>NO = 2<br>DON'T KNOW = 98<br>REFUSED TO SAY = 99                           | ONLY IF HIV POSITIVE (FROM 315 OR 325 OR 337)<br><br>INSERT GRAPHIC OF ARVS. | C |  |  |
| 342                     |  | Did you ever breastfeed <b>(NAME)</b> ?                                                                                                             | YES = 1<br>NO = 2<br>REFUSED TO SAY = 99                                              | IF NO, REFUSED → 346                                                         | C |  |  |
| 343                     |  | For how long did you breastfeed <b>(NAME)</b> ?<br><br>ONLY ONE OPTION MAY BE SELECTED. FOR EXAMPLE, ANSWER ONLY IN WEEKS OR IN MONTHS.             | WEEKS ____<br>MONTHS ____<br>STILL BREASTFEEDING=3<br>DON'T KNOW = 98<br>REFUSED = 99 |                                                                              | C |  |  |
| 344                     |  | Did you continue taking ARVs while you were breastfeeding <b>(NAME)</b> ?                                                                           | YES = 1<br>NO = 2<br>REFUSED TO SAY = 99                                              | FOR HIV POSITIVE ONLY (FROM 315 OR 325 OR 337)                               | S |  |  |

|     |  |                                                                                                                                                                                                                              |                                                             |                                                                                              |  |   |  |
|-----|--|------------------------------------------------------------------------------------------------------------------------------------------------------------------------------------------------------------------------------|-------------------------------------------------------------|----------------------------------------------------------------------------------------------|--|---|--|
| 345 |  | Did you stop taking ARVs or HIV medicines once you stopped breastfeeding?                                                                                                                                                    | YES = 1<br>NO = 2<br>DON'T KNOW = 8<br>REFUSED = 9          | ONLY IF HIV POSITIVE (FROM 315 OR 325 OR 337) AND ON TREATMENT (341)                         |  | Y |  |
| 346 |  | <p><b>FOR NON-BREASTFEEDING MOTHERS:</b></p> <p>After <b>(NAME)</b> was born, was he/she tested for HIV?</p> <p><b>FOR BREASTFEEDING MOTHERS:</b></p> <p>While you were breastfeeding, was <b>(NAME)</b> tested for HIV?</p> | YES = 1<br>NO = 2<br>DON'T KNOW = 98<br>REFUSED TO SAY = 99 | FROM 342<br><br>IF NO, DK, REFUSED →352<br><br>ONLY IF HIV POSITIVE (FROM 315 OR 325 OR 337) |  | Y |  |
| 347 |  | How old was <b>(NAME)</b> when he/she first tested for HIV?                                                                                                                                                                  | WEEKS ____<br>MONTHS ____<br>YEARS ____<br>DON'T KNOW = 98  | ONLY IF HIV POSITIVE (FROM                                                                   |  | Y |  |

|     |  |                                                                                                                     |                                                                                                                                                                              |                                                                                                         |  |   |  |
|-----|--|---------------------------------------------------------------------------------------------------------------------|------------------------------------------------------------------------------------------------------------------------------------------------------------------------------|---------------------------------------------------------------------------------------------------------|--|---|--|
|     |  |                                                                                                                     | REFUSED = 99                                                                                                                                                                 | 315 OR<br>325 OR<br>337)<br><br>CANNOT<br>BE MORE<br>THAN<br>BREAST-<br>FEEDING<br>MONTHS<br>(343)      |  |   |  |
| 348 |  | What was the result of <b>(NAME)</b> 's first HIV test?                                                             | POSITIVE, <b>(NAME)</b> HAS HIV = 1<br>NEGATIVE, <b>(NAME)</b> DOES NOT HAVE HIV = 2<br>UNKNOWN = 3<br>DID NOT RECEIVE RESULTS = 4<br>DON'T KNOW = 98<br>REFUSED TO SAY = 99 | ONLY IF<br>HIV POSI-<br>TIVE<br>(FROM<br>315 OR<br>325 OR<br>337)                                       |  | Y |  |
| 349 |  | After you stopped breastfeeding, was <b>(NAME)</b> tested for HIV?<br><br>SKIP IF NOT BREASTFED (FROM 342 OPTION 2) | YES = 1<br>NO = 2<br>DON'T KNOW = 98<br>REFUSED TO SAY = 99                                                                                                                  | ONLY IF<br>HIV POSI-<br>TIVE<br>(FROM<br>315 OR<br>325 OR<br>337)<br><br>IF NO, DK,<br>REFUSED<br>→ 351 |  | Y |  |

|     |  |                                                                                  |                                                                                                                                                                              |                                                      |  |   |  |
|-----|--|----------------------------------------------------------------------------------|------------------------------------------------------------------------------------------------------------------------------------------------------------------------------|------------------------------------------------------|--|---|--|
| 350 |  | What was the result of <b>(NAME)</b> 's HIV test?                                | POSITIVE, <b>(NAME)</b> HAS HIV = 1<br>NEGATIVE, <b>(NAME)</b> DOES NOT HAVE HIV = 2<br>UNKNOWN = 3<br>DID NOT RECEIVE RESULTS = 4<br>DON'T KNOW = 98<br>REFUSED TO SAY = 99 | ONLY IF MOTHER-HIV POSITIVE (FROM 315 OR 325 OR 337) |  | Y |  |
| 351 |  | <b>INTERVIEWER READ:</b> THANK YOU FOR THE INFORMATION REGARDING <b>(NAME)</b> . |                                                                                                                                                                              |                                                      |  |   |  |

| NO.                    | VARNAME | QUESTIONS                         | CODING CATEGORIES                                           | SKIPS/FILTERS          | CORE/SUPPLEMENT | AKAIS ONLY | NOTES |
|------------------------|---------|-----------------------------------|-------------------------------------------------------------|------------------------|-----------------|------------|-------|
| 352                    |         | Are you pregnant now?             | YES = 1<br>NO = 2<br>DON'T KNOW = 98<br>REFUSED TO SAY = 99 | IF NO, DK, REFUSED 354 | C               |            |       |
| 353                    |         | How many months pregnant are you? | MONTHS __<br><br>DON'T KNOW = 98<br>REFUSED TO SAY = 99     | SKIP TO 401            | S               |            |       |
| <b>FAMILY PLANNING</b> |         |                                   |                                                             |                        |                 |            |       |

| NO. | VARNAME | QUESTIONS                                                                                                       | CODING CATEGORIES                                                                                                                                                                                                                                                                                                                                                                                                                                                                                                                                                                                                                                       | SKIPS/FILTERS   | CORE/S<br>UPPLE-<br>MENT | AKAIS<br>ONLY | NOTES |
|-----|---------|-----------------------------------------------------------------------------------------------------------------|---------------------------------------------------------------------------------------------------------------------------------------------------------------------------------------------------------------------------------------------------------------------------------------------------------------------------------------------------------------------------------------------------------------------------------------------------------------------------------------------------------------------------------------------------------------------------------------------------------------------------------------------------------|-----------------|--------------------------|---------------|-------|
| 354 |         | Are you (your partner) <b>currently</b> doing something or using any method to delay or avoid getting pregnant? | YES = 1<br>NO = 2<br>DON'T KNOW = 98<br>REFUSED TO SAY = 99                                                                                                                                                                                                                                                                                                                                                                                                                                                                                                                                                                                             | IF YES THEN 356 | C                        |               |       |
| 355 |         | Why are you not using a method to prevent pregnancy?<br><br>PROBE FOR ALL RESPONSES<br><br>RECORD ALL MENTIONED | NOT MARRIED/NO PARTNER = 1<br>NOT HAVING SEX = 2<br>INFREQUENT SEX = 3<br>MENOPAUSAL/HYSTERECTOMY = 4<br>CAN'T GET PREGNANT = 5<br>NOT MENSTRUATED SINCE LAST BIRTH = 6<br>BREASTFEEDING = 7<br>UP TO GOD/FATALISTIC = 8<br>RESPONDENT OPPOSED = 9<br>HUSBAND/PARTNER OPPOSED = 10<br>RELIGION PROHIBITS= 11<br>KNOWS NO METHOD = 12<br>KNOWS NO SOURCE = 13<br>SIDE EFFECTS/HEALTH CONCERNS = 14<br>LACK OF ACCESS/TOO FAR = 15<br>COSTS TOO MUCH = 16<br>PREFERRED METHOD NOT AVAILABLE =17<br>NO METHOD AVAILABLE = 18<br>INCONVENIENT TO USE = 19<br>INTERFERES WITH BODY'S NORMAL PROCESSES = 20<br>WANTS MORE CHILDREN=21<br>OTHER (SPECIFY) = 96 | END MODULE      | S                        |               |       |

| NO. | VARNAME | QUESTIONS                                                                | CODING CATEGORIES                                                                                                                                                                                                                                                                                                          | SKIPS/FILTERS                     | CORE/S<br>UPPLE-<br>MENT | AKAIS<br>ONLY | NOTES |
|-----|---------|--------------------------------------------------------------------------|----------------------------------------------------------------------------------------------------------------------------------------------------------------------------------------------------------------------------------------------------------------------------------------------------------------------------|-----------------------------------|--------------------------|---------------|-------|
|     |         |                                                                          | DON'T KNOW = 98<br>REFUSED = 99                                                                                                                                                                                                                                                                                            |                                   |                          |               |       |
| 356 |         | Which method are you (your partner) using?<br><br>SELECT ALL THAT APPLY. | FEMALE STERILIZATION = 1<br>MALE STERILIZATION = 2<br>PILL = 3<br>IUD/ "COIL" = 4<br>INJECTIONS = 5<br>IMPLANT = 6<br>MALE CONDOM = 7<br>FEMALE CONDOM = 8<br>RHYTHM/NATURAL METHODS = 9<br>WITHDRAWAL = 10<br>NOT HAVING SEX/ABSTINENCE =11<br>OTHER (SPECIFY)= 96<br><br>_____<br>DON'T KNOW = 98<br>REFUSED TO SAY = 99 |                                   | C                        |               |       |
| 357 |         | Would you like to have a/another child?                                  | YES, HAVE (A/ANOTHER) CHILD = 1<br>NO MORE/NONE = 2<br>NO, (PARTNER) CANNOT GET PREGNANT = 3<br>UNDECIDED/DON'T KNOW = 8<br>REFUSED = 9                                                                                                                                                                                    | IF NO MORE/NONE, DK, REFUSED →401 | S                        |               |       |



| NO. | VARNAME | QUESTIONS                                                                                                                      | CODING CATEGORIES                                                                                           | SKIPS/FILTERS | CORE/SUPPLEMENT | AKAIS ONLY | NOTES |
|-----|---------|--------------------------------------------------------------------------------------------------------------------------------|-------------------------------------------------------------------------------------------------------------|---------------|-----------------|------------|-------|
| 358 |         | <p>How long would you like to wait before the birth of a/another child? Give your best estimate.</p> <p>PROBE FOR ESTIMATE</p> | <p>MONTHS ____<br/> YEARS ____<br/> OTHER (SPECIFY) = 96</p> <hr/> <p>DON'T KNOW = 98<br/> REFUSED = 99</p> | END MODULE    | S               |            |       |

**MODULE 4: CHILDREN**

| NO.                                                                                                                                                                                                                                                                                                                                                                                                                      | VAR-NAME | QUESTIONS                                                                                                                     | CODING CATEGORIES      | SKIPS/FILTERS        | CORE/SUPPLEMENT | AKAIS ONLY | NOTES                                           |
|--------------------------------------------------------------------------------------------------------------------------------------------------------------------------------------------------------------------------------------------------------------------------------------------------------------------------------------------------------------------------------------------------------------------------|----------|-------------------------------------------------------------------------------------------------------------------------------|------------------------|----------------------|-----------------|------------|-------------------------------------------------|
| <p>THE HOUSEHOLD SCHEDULE NOTED THAT <b>[NAME OF PARTICIPANT]</b> WILL FILL OUT THE CHILDREN'S MODULE FOR <b>[NUMBER OF CHILDREN]</b>.</p> <p>I AM GOING TO ASK YOU A NUMBER OF QUESTIONS ABOUT YOUR CHILD/CHILDREN REGARDING THEIR HEALTH AND WHERE THEY GET THEIR HEALTH SERVICES. WE WILL ASK YOU ABOUT THESE CHILDREN:</p> <p>LIST OF HOUSEHOLD MEMBERS FROM HOUSEHOLD SCHEDULE</p> <p><b>[LIST OF CHILDREN]</b></p> |          |                                                                                                                               |                        |                      |                 |            |                                                 |
| 401                                                                                                                                                                                                                                                                                                                                                                                                                      |          | <p>DO NOT READ:</p> <p>CHECK HOUSEHOLD SCHEDULE TO GET NUMBER OF CHILDREN FOR THIS PARTICIPANT</p> <p>IF NONE RECORD '00'</p> | NUMBER OF CHILDREN ___ | IF 00 → NEXT SECTION | C               |            |                                                 |
| 402                                                                                                                                                                                                                                                                                                                                                                                                                      |          | SCAN THE BARCODE OF THE CHILD FROM THE HOUSEHOLD LISTING                                                                      | _____                  |                      |                 |            | PROGRAM TO DETERMINE HOW TO LINK TO HH SCHEDULE |

|     |  |                                                                                                                                                          |                                                               |                                                                                                        |   |  |  |
|-----|--|----------------------------------------------------------------------------------------------------------------------------------------------------------|---------------------------------------------------------------|--------------------------------------------------------------------------------------------------------|---|--|--|
| 403 |  | <p>Interviewer: Begin with the youngest child</p> <p>What is your first youngest/second youngest/ and so on / oldest child's first name or nickname?</p> | _____                                                         | START WITH THE YOUNGEST CHILD                                                                          |   |  |  |
| 404 |  | <p>How old was <b>(NAME)</b> at his/her last birthday?</p> <p>ENTER '0' IF CHILD IS LESS THAN ONE-YEAR-OLD AT PRESENT.</p>                               | <p>YEARS ____</p> <p>DON'T KNOW = 98</p> <p>REFUSED = 99</p>  | <p>&gt;0, DK, REFUSED →406</p> <p>&lt;0 THEN GO TO 405</p> <p>AGE CANNOT BE GREATER THAN 14 YEARS.</p> | C |  |  |
| 405 |  | <p>How old is <b>[NAME]</b> in months?</p>                                                                                                               | <p>MONTHS ____</p> <p>DON'T KNOW = 98</p> <p>REFUSED = 99</p> |                                                                                                        | C |  |  |

|     |  |                                                                                       |                                                                                                                    |                                                    |   |  |  |
|-----|--|---------------------------------------------------------------------------------------|--------------------------------------------------------------------------------------------------------------------|----------------------------------------------------|---|--|--|
| 406 |  | Is <b>(NAME)</b> a boy or girl?                                                       | BOY = 1<br>GIRL = 2<br>DON'T KNOW = 98<br>REFUSED = 99                                                             |                                                    | C |  |  |
| 407 |  | Is <b>[NAME]</b> enrolled in school?                                                  | YES = 1<br>NO, CURRENTLY NOT IN SCHOOL = 2<br>NO, TOO YOUNG TO BE IN SCHOOL = 3<br>DON'T KNOW = 98<br>REFUSED = 99 | IF NO,<br>TOO<br>YOUNG,<br>DK,<br>REFUSED<br>→ 412 |   |  |  |
| 408 |  | Was <b>[NAME]</b> enrolled in school during the previous school year?                 | YES = 1<br>NO = 2<br>DON'T KNOW = 98<br>REFUSED = 99                                                               | IF NO,<br>DK,<br>REFUSED<br>→412                   |   |  |  |
| 409 |  | What year was <b>[NAME]</b> in during the previous school year?                       | YEAR: _____<br>DON'T KNOW = 98<br>REFUSED = 99                                                                     |                                                    |   |  |  |
| 410 |  | What is the highest level of school <b>[NAME]</b> has attended: primary or secondary? | PRIMARY = 1<br>SECONDARY = 2<br>DON'T KNOW = 98<br>REFUSED = 99                                                    | IF DK,<br>REFUSED<br>→ 412                         |   |  |  |

|     |  |                                                                                                                                               |                                                                                                                         |                                                                                                                        |   |   |  |
|-----|--|-----------------------------------------------------------------------------------------------------------------------------------------------|-------------------------------------------------------------------------------------------------------------------------|------------------------------------------------------------------------------------------------------------------------|---|---|--|
| 411 |  | What year is <b>[NAME]</b> in now?                                                                                                            | YEAR ____<br>DON'T KNOW = 98<br>REFUSED = 99                                                                            |                                                                                                                        |   |   |  |
| 412 |  | Has <b>(NAME)</b> ever received a blood transfusion?                                                                                          | YES = 1<br>NO = 2<br>DON'T KNOW=98<br>REFUSED TO SAY=99                                                                 |                                                                                                                        |   | Y |  |
| 413 |  | Is <b>(NAME)</b> circumcised?                                                                                                                 | YES = 1<br>NO = 2<br>DON'T KNOW=98<br>REFUSED TO SAY=99                                                                 | IF NO,<br>DK, RE-<br>FUDED →<br>417<br><br>MALES<br>ONLY.<br><br>SHOW<br>PICTURE<br>OF CIR-<br>CUM-<br>CISED<br>PENIS. | C |   |  |
| 414 |  | How old was <b>(NAME)</b> when he was circumcised?<br><br>ONLY ONE OPTION MAY BE SELECTED.<br>FOR EXAMPLE, ANSWER ONLY IN YEARS OR IN MONTHS. | CODE '00' IF LESS THAN ONE MONTH.<br>MONTHS ____ (LESS THAN 12 MONTHS)<br>YEARS ____<br>DON'T KNOW = 98<br>REFUSED = 99 | MALES<br>ONLY.                                                                                                         | S |   |  |

|     |  |                                                             |                                                                                                                                                                                    |                                                           |   |   |  |
|-----|--|-------------------------------------------------------------|------------------------------------------------------------------------------------------------------------------------------------------------------------------------------------|-----------------------------------------------------------|---|---|--|
| 415 |  | Where was <b>(NAME)</b> circumcised?                        | AT HOME = 1<br>IN A PUBLIC CLINIC OR HEALTH FACILITY = 2<br>PRIVATE CLINIC OR HELATH FACILITY = 3<br>OTHER (SPECIFY) = 96<br><br>_____<br><br>DON'T KNOW = 98<br>REFUSED TO SAY=99 | MALES ONLY                                                |   | Y |  |
| 416 |  | Who circumcised <b>(NAME)</b> ?                             | TRADITIONAL PRACTITIONER/CIRCUM-<br>CISER/LOCAL BABA = 1<br>CLINICIAN=2<br>OTHER (SPECIFY) = 96<br><br>_____<br><br>DON'T KNOW = 98<br>REFUSED TO SAY=99                           | MALES ONLY<br><br>SKIP TO 418                             | C |   |  |
| 417 |  | Are you planning to circumcise <b>(NAME)</b> in the future? | YES = 1<br>NO = 2<br>DON'T KNOW = 98<br>REFUSED TO SAY=99                                                                                                                          | MALES ONLY                                                | S |   |  |
| 418 |  | Has <b>(NAME)</b> ever been tested for HIV?                 | YES = 1<br>NO = 2<br>DON'T KNOW = 98<br>REFUSED TO SAY=99                                                                                                                          | IF NO,<br>DK, RE-<br>FUSED<br>→419<br><br>IF YES –<br>420 | C |   |  |

|     |  |                                                                                                                    |                                                                                                                                                                                                                                                                                                                                                                                                                                                                                                                                                         |               |   |   |  |
|-----|--|--------------------------------------------------------------------------------------------------------------------|---------------------------------------------------------------------------------------------------------------------------------------------------------------------------------------------------------------------------------------------------------------------------------------------------------------------------------------------------------------------------------------------------------------------------------------------------------------------------------------------------------------------------------------------------------|---------------|---|---|--|
| 419 |  | <p>Why has <b>[NAME]</b> never been tested for HIV?</p> <p>SELECT ALL THAT APPLY.</p> <p>PROBE FOR ALL ANSWERS</p> | <p>DON'T KNOW WHERE TO TEST = 1<br/> TEST COSTS TOO MUCH = 2<br/> TRANSPORT COSTS TOO MUCH = 3<br/> TOO FAR AWAY = 4<br/> AFRAID OTHERS WILL KNOW ABOUT TEST RESULTS = 5<br/> DON'T NEED TEST/LOW RISK = 6<br/> DID NOT RECEIVE PERMISSION FROM SPOUSE/FAMILY = 7<br/> AFRAID SPOUSE/PARTNER/FAMILY WILL KNOW RESULTS = 8<br/> DON'T WANT TO KNOW CHILD HAS HIV = 9<br/> CANNOT GET TREATMENT FOR HIV = 10<br/> TEST KITS NOT AVAILABLE = 11<br/> RELIGIOUS REASONS = 12<br/> OTHER = 13<br/> SPECIFY: _____<br/> DON'T KNOW = 98<br/> REFUSED = 99</p> | →443          |   |   |  |
| 420 |  | <p>How many times has <b>(NAME)</b> been tested for HIV?</p>                                                       | <p>NUMBER OF TIMES _____<br/> DON'T KNOW = 98<br/> REFUSED TO SAY= 99</p>                                                                                                                                                                                                                                                                                                                                                                                                                                                                               | CAN'T BE ZERO |   | Y |  |
| 421 |  | <p>Where were the HIV test(s) done?</p> <p>SELECT ALL THAT APPLY.</p>                                              | <p>CHILD WELFARE CLINIC-1<br/> IN-PATIENT WARD = 2<br/> OUTPATIENT CLINIC =3<br/> TB CLINIC = 4<br/> POST-NATAL CLINIC=5</p>                                                                                                                                                                                                                                                                                                                                                                                                                            |               | S |   |  |

|     |  |                                                                                                                                                                                                                               |                                                                                                                                             |                                                                      |   |  |  |
|-----|--|-------------------------------------------------------------------------------------------------------------------------------------------------------------------------------------------------------------------------------|---------------------------------------------------------------------------------------------------------------------------------------------|----------------------------------------------------------------------|---|--|--|
|     |  |                                                                                                                                                                                                                               | OTHER (SPECIFY) = 96<br>_____<br>DON'T KNOW = 98<br>REFUSED TO SAY=99                                                                       |                                                                      |   |  |  |
| 422 |  | What month and year was [NAME]'s last HIV test done?<br><br>IF LESS THAN ONE MONTH, CODE '00'.                                                                                                                                | MONTH ____ ____<br>DON'T KNOW MONTH = 98<br>REFUSED MONTH = 99<br><br>YEAR ____ ____ ____ ____<br>DON'T KNOW YEAR = 98<br>REFUSED YEAR = 99 | DATE RE-<br>STRAINT<br>S                                             | C |  |  |
| 423 |  | What was <b>(NAME)</b> 's <u>last</u> HIV test result?                                                                                                                                                                        | POSITIVE = 1<br>NEGATIVE = 2<br>INDETERMINATE = 3<br>DID NOT RECEIVE RESULTS = 4<br>DON'T KNOW = 98<br>REFUSED TO SAY=99                    | IF NEG,<br>INDET,<br>DID NOT<br>RECEIVE,<br>DK, RE-<br>FUSED→<br>443 | C |  |  |
| 424 |  | What was the month and year of <b>(NAME)</b> 's first HIV positive test result? Please give your best guess.<br><br>This will be the very first HIV positive test result that you have received.<br><br>PROBE TO VERIFY DATE. | MONTH ____ ____<br>DON'T KNOW MONTH = 98<br>REFUSED MONTH = 99<br><br>YEAR ____ ____ ____ ____<br>DON'T KNOW YEAR = 98<br>REFUSED YEAR = 99 |                                                                      | C |  |  |



|     |  |                                                                                                                                               |                                                                                                                                                                                                                                                                                                                                                     |                 |   |  |  |
|-----|--|-----------------------------------------------------------------------------------------------------------------------------------------------|-----------------------------------------------------------------------------------------------------------------------------------------------------------------------------------------------------------------------------------------------------------------------------------------------------------------------------------------------------|-----------------|---|--|--|
| 425 |  | Has <b>(NAME)</b> ever received HIV care from a health care provider?                                                                         | YES = 1<br>NO = 2<br>DON'T KNOW = 98<br>REFUSED TO SAY=99                                                                                                                                                                                                                                                                                           | IF YES →<br>427 | C |  |  |
| 426 |  | What is the <u>main</u> reason why <b>(NAME)</b> has never seen a health care provider for HIV care?<br><br>SELECT ONLY ONE RESPONSE          | FACILITY IS TOO FAR AWAY = 1<br>I DON'T KNOW WHERE TO GET HIV CARE = 2<br>COST OF CARE = 3<br>COST OF TRANSPORT = 4<br>I DON'T THINK HE/SHE NEEDS IT, HE/SHE IS NOT SICK = 5<br>I FEAR PEOPLE WILL KNOW THAT HE/SHE HAS HIV IF I TAKE HIM/HER TO A CLINIC = 6<br>HE/SHE IS TAKING TRADITIONAL MEDICINE = 7<br>DON'T KNOW = 98<br>REFUSED TO SAY= 99 | →443            | C |  |  |
| 427 |  | After learning of <b>(NAME)</b> 's HIV diagnosis, what month and year did <b>(NAME)</b> <u>first</u> see a health care provider for HIV care? | MONTH _____<br>DON'T KNOW MONTH = 98<br>REFUSED MONTH= 99<br>YEAR _____<br>DON'T KNOW YEAR =9998<br>REFUSED = 9999                                                                                                                                                                                                                                  |                 |   |  |  |
| 428 |  | What month and year did <b>(NAME)</b> <u>last</u> see a health care provider for HIV care?                                                    | MONTH _____<br>DON'T KNOW MONTH = 98<br>REFUSED MONTH= 99<br>YEAR _____<br>DON'T KNOW YEAR =9998<br>REFUSED = 9999                                                                                                                                                                                                                                  |                 | C |  |  |

|     |  |                                                                                                                                                                                                       |                                                                                                                                                                                                                                                                                                                                                                                                                                                              |                             |   |  |  |
|-----|--|-------------------------------------------------------------------------------------------------------------------------------------------------------------------------------------------------------|--------------------------------------------------------------------------------------------------------------------------------------------------------------------------------------------------------------------------------------------------------------------------------------------------------------------------------------------------------------------------------------------------------------------------------------------------------------|-----------------------------|---|--|--|
| 429 |  | <p>What is the <u>main</u> reason for <b>(NAME)</b> not seeing a health care provider for HIV medical care in the past 6 months?</p> <p>SELECT ONLY ONE RESPONSE</p> <p>PROBE FOR THE MAIN REASON</p> | <p>FACILITY IS TOO FAR AWAY = 1<br/>         COST OF CARE = 2<br/>         COST OF TRANSPORT = 3<br/>         I DON'T THINK HE/SHE NEEDS IT, HE/SHE IS NOT SICK = 4<br/>         I FEAR PEOPLE WILL KNOW THAT HE/SHE HAS HIV IF I TAKE HIM/HER TO A CLINIC = 5<br/>         RELIGIOUS REASONS = 6<br/>         HE/SHE IS TAKING TRADITIONAL MEDICINE = 7<br/>         OTHER (SPECIFY) = 96</p> <p>_____</p> <p>DON'T KNOW = 98<br/>         REFUSED = 99</p> |                             | C |  |  |
| 430 |  | <p>Has <b>(NAME)</b> ever had a CD4 count test?<br/>         The CD4 count tells you how sick you are with HIV and if you need take ARVs or HIV medications.</p>                                      | <p>YES = 1<br/>         NO = 2<br/>         DON'T KNOW = 98<br/>         REFUSED TO SAY = 99</p>                                                                                                                                                                                                                                                                                                                                                             | IF NO, DK, REFUSED → 432    | C |  |  |
| 431 |  | <p>What month and year did <b>(NAME)</b>'s health care provider last test his/her CD4 count?</p>                                                                                                      | <p>MONTH _____<br/>         DON'T KNOW MONTH = 98<br/>         REFUSED MONTH = 99<br/>         YEAR _____<br/>         DON'T KNOW YEAR = 9998<br/>         REFUSED = 9999</p>                                                                                                                                                                                                                                                                                |                             | C |  |  |
| 432 |  | <p>Has <b>(NAME)</b> ever taken ARVs or HIV medications, to treat his/her HIV infection?</p>                                                                                                          | <p>YES = 1<br/>         NO = 2<br/>         DON'T KNOW = 98<br/>         REFUSED TO SAY = 99</p>                                                                                                                                                                                                                                                                                                                                                             | IF YES → 434<br>USE GRAPHIC | C |  |  |

|     |  |                                                                                                                                                           |                                                                                                                                                                                                                                                                                                                                                                                               |              |   |  |  |
|-----|--|-----------------------------------------------------------------------------------------------------------------------------------------------------------|-----------------------------------------------------------------------------------------------------------------------------------------------------------------------------------------------------------------------------------------------------------------------------------------------------------------------------------------------------------------------------------------------|--------------|---|--|--|
| 433 |  | <p>What is the <u>main</u> reason (<b>NAME</b>) has never taken ARVs or HIV medications?</p> <p>SELECT ONLY ONE RESPONSE</p> <p>PROBE FOR MAIN REASON</p> | <p>NOT ELIGIBLE FOR TREATMENT=1<br/> HEALTH CARE PROVIDER DID NOT PRESCRIBE = 2<br/> HIV MEDICINES NOT AVAILABLE = 3<br/> I DON'T THINK NEEDS IT, HE/SHE IS NOT SICK = 4<br/> COST OF MEDICATIONS = 5<br/> COST OF TRANSPORT = 6<br/> RELIGIOUS REASONS = 7<br/> TAKING TRADITIONAL MEDICATIONS = 8<br/> OTHER (SPECIFY) = 96</p> <p>_____</p> <p>DON'T KNOW = 98<br/> REFUSED TO SAY= 99</p> | →438         | C |  |  |
| 434 |  | <p>When did (<b>NAME</b>) first start taking ARVs or HIV medications?</p>                                                                                 | <p>MONTH _____</p> <p>DON'T KNOW MONTH = 98<br/> REFUSED MONTH= 99</p> <p>YEAR _____</p> <p>DON'T KNOW YEAR =9998<br/> REFUSED = 9999</p>                                                                                                                                                                                                                                                     |              | C |  |  |
| 435 |  | <p>Is (<b>NAME</b>) currently taking ARVs or HIV medications?</p>                                                                                         | <p>YES = 1<br/> NO = 2<br/> DON'T KNOW = 98<br/> REFUSED TO SAY= 99</p>                                                                                                                                                                                                                                                                                                                       | IF YES → 437 | C |  |  |
| 436 |  | <p>What is the <u>main</u> reason why (<b>NAME</b>) is not taking ARVs or HIV medications?</p>                                                            | <p>I HAVE TROUBLE GIVING HIM/HER A TABLET EVERYDAY = 1<br/> HAD SIDE EFFECTS/RASH = 2<br/> FACILITY/PHARMACY TOO FAR AWAY TO GET MEDICATION REGULARLY = 3</p>                                                                                                                                                                                                                                 | → 438        | C |  |  |

|     |  |                                                                                                                                                 |                                                                                                                                                                                                                                                                           |                                    |   |  |  |
|-----|--|-------------------------------------------------------------------------------------------------------------------------------------------------|---------------------------------------------------------------------------------------------------------------------------------------------------------------------------------------------------------------------------------------------------------------------------|------------------------------------|---|--|--|
|     |  |                                                                                                                                                 | COST OF MEDICATIONS = 4<br>COST OF TRANSPORT = 5<br>HE/SHE IS HEALTHY; HE/SHE IS NOT SICK = 6<br>FACILITY WAS OUT OF STOCK = 7<br>RELIGIOUS REASONS=8<br>HE/SHE IS TAKING TRADITIONAL MEDICATIONS = 9<br>OTHER (SPECIFY) = 96<br>_____<br>DON'T KNOW = 98<br>REFUSED = 99 |                                    |   |  |  |
| 437 |  | People sometimes forget to take their ARVs. In the past 30 days, how many days has <b>(NAME)</b> missed taking any ARV pills (HIV medications)? | NUMBER OF DAYS _____<br>DON'T KNOW = 98<br>REFUSED = 99                                                                                                                                                                                                                   |                                    | C |  |  |
| 438 |  | Has <b>(NAME)</b> ever had a viral load test?<br><br>This is a test that measures how much HIV is in your blood.                                | YES= 1<br>NO= 2<br>DON'T KNOW = 98<br>REFUSED TO SAY= 99                                                                                                                                                                                                                  | If NO,<br>DK, RE-<br>FUSED<br>→441 | S |  |  |
| 439 |  | What month and year was <b>(NAME)</b> <u>last</u> viral load test?                                                                              | MONTH _____<br>DON'T KNOW MONTH = 98<br>REFUSED MONTH= 99<br>YEAR _____<br>DON'T KNOW YEAR =9998<br>REFUSED = 9999                                                                                                                                                        |                                    | S |  |  |

|     |  |                                                                                                                                         |                                                                                                                                                                                                                                                                                                                         |                                                                                                                  |   |  |  |
|-----|--|-----------------------------------------------------------------------------------------------------------------------------------------|-------------------------------------------------------------------------------------------------------------------------------------------------------------------------------------------------------------------------------------------------------------------------------------------------------------------------|------------------------------------------------------------------------------------------------------------------|---|--|--|
| 440 |  | Were you told the result of <b>(NAME)</b> 's viral load test?                                                                           | YES= 1<br>NO= 2<br>DON'T KNOW = 98<br>REFUSED TO SAY= 99                                                                                                                                                                                                                                                                |                                                                                                                  | S |  |  |
| 441 |  | Is <b>(NAME)</b> currently taking Septrin or Cotrimoxazole?                                                                             | YES = 1<br>NO = 2<br>I DON'T KNOW WHAT IT IS = 3<br>DON'T KNOW = 98<br>REFUSED TO SAY= 99                                                                                                                                                                                                                               | IF YES<br>(1), IDK<br>(3), DK<br>(98), REFUSED<br>(99) →<br>443<br><br>SHOW GRAPHIC OF SEPTRIN OR COTRIMOXAZOLE. | C |  |  |
| 442 |  | Can you tell me the <u>main</u> reason why <b>(NAME)</b> is not <u>currently</u> taking Septrin or cotrim daily?<br><br>SELECT ONLY ONE | NOT PRESCRIBED = 1<br>I HAVE TROUBLE GIVING HIM/HER A TABLET EVERYDAY = 2<br>HE/SHE HAD SIDE EFFECTS/RASH = 3<br>FACILITY/PHARMACY TOO FAR AWAY TO GET SEPTRIN OR COTROMOXIAZOLE REGULARLY = 4<br>HE/SHE DOES NOT NEED IT, HE/SHE IS NOT SICK = 5<br>PHARMACY/ FACILITY WAS OUT OF STOCK = 6<br>COST OF MEDICATIONS = 7 |                                                                                                                  | S |  |  |

|     |  |                                                                                           |                                                                                                                                   |                                            |   |  |  |
|-----|--|-------------------------------------------------------------------------------------------|-----------------------------------------------------------------------------------------------------------------------------------|--------------------------------------------|---|--|--|
|     |  |                                                                                           | COST OF TRANSPORT = 8<br>DOCTOR SAID NO LONGER NEEDED = 9<br>OTHER (SPECIFY) = 96<br><hr/> DON'T KNOW = 98<br>REFUSED TO SAY = 99 |                                            |   |  |  |
| 443 |  | Has <b>[NAME]</b> ever visited a clinic for tuberculosis (TB) for diagnosis or treatment? | YES = 1<br>NO = 2<br>DON'T KNOW = -8<br>REFUSED = -9                                                                              | NO, DK, REFUSED<br>→ SKIP TO END OF MODULE | C |  |  |
| 444 |  | Have you ever been told by a health care provider that <b>[NAME]</b> had TB?              | YES = 1<br>NO=2<br>DON'T KNOW = -8<br>REFUSED = -9                                                                                | NO, DK, REFUSED<br>→ SKIP TO END OF MODULE | C |  |  |
| 445 |  | Was <b>[NAME]</b> ever treated for TB?                                                    | YES = 1<br>NO = 2<br>DON'T KNOW = -8<br>REFUSED = -9                                                                              | NO, DK, REFUSED<br>→ SKIP TO END OF MODULE | C |  |  |

|                                                                                                                                                                                                                                                           |  |                                                                                                                                                                                                               |                                                          |                                   |   |  |  |
|-----------------------------------------------------------------------------------------------------------------------------------------------------------------------------------------------------------------------------------------------------------|--|---------------------------------------------------------------------------------------------------------------------------------------------------------------------------------------------------------------|----------------------------------------------------------|-----------------------------------|---|--|--|
| 446                                                                                                                                                                                                                                                       |  | Is <b>[NAME]</b> currently on treatment for TB?                                                                                                                                                               | YES = 1<br>NO = 2<br>DON'T KNOW = 8<br>REFUSED = 9       | NO, DK,<br>REFUSED<br>→ 448       | C |  |  |
| 447                                                                                                                                                                                                                                                       |  | The last time <b>[NAME]</b> was treated for TB, did <b>[NAME]</b> complete at least 6 months of treatment?                                                                                                    | YES = 1<br>NO = 2<br>DON'T KNOW = 8<br>REFUSED = 9       |                                   | C |  |  |
| 448                                                                                                                                                                                                                                                       |  | Did you ever receive a basic care kit that may have contained items for your HIV care?<br><br>These items may have included a bucket, a mosquito net, water guard, a filter cloth, and educational materials. | YES = 1<br>NO=2<br>DON'T KNOW = 98<br>REFUSED TO SAY= 99 |                                   | S |  |  |
| 449                                                                                                                                                                                                                                                       |  | Thank you for the information about <b>[NAME]</b> .<br><br>DOES THE RESPONDENT HAVE ANOTHER CHILD AGED 0-14 YEARS?                                                                                            | YES = 1<br>NO = 2                                        | YES→RE-TURN BE-GINNING OF MOD-ULE | C |  |  |
| <b>INTERVIEWER: IF PARENT/GUARDIAN HAS ANOTHER CHILD UNDER 14 YEARS BESIDES (NAME), GO TO TOP, 401, AND ASK ABOUT NEXT YOUNGEST CHILD. IF NO OTHER CHILDREN, THEN CONTINUE TO NEXT SECTION. ASK EACH QUESTION FOR ALL CHILDREN AGE 0 MONTHS- 14 YEARS</b> |  |                                                                                                                                                                                                               |                                                          |                                   |   |  |  |

**MODULE 5: SEXUAL ACTIVITY**

| NO.                                                                                                                                                                                                                                                                                                                                                                              | VARNA<br>ME | QUESTIONS                                                                                | CODING CATEGORIES                                           | SKIPS/FILTE<br>RS                                                             | CORE/SUPP<br>LEMENT | AKAIS ONLY | NOTES              |
|----------------------------------------------------------------------------------------------------------------------------------------------------------------------------------------------------------------------------------------------------------------------------------------------------------------------------------------------------------------------------------|-------------|------------------------------------------------------------------------------------------|-------------------------------------------------------------|-------------------------------------------------------------------------------|---------------------|------------|--------------------|
| <p>Now I would like to ask you some questions about your sexual activity in order to gain a better understanding of some important life issues. Let me assure you again that your answers are completely confidential and will not be told to anyone. If we should come to any question that you don't want to answer, just let me know and we will go to the next question.</p> |             |                                                                                          |                                                             |                                                                               |                     |            |                    |
| 501                                                                                                                                                                                                                                                                                                                                                                              |             | Have you ever had sex?                                                                   | YES = 1<br>NO = 2<br>DON'T KNOW = 98<br>REFUSED TO SAY = 99 | ONLY IF SINGLE,<br>NEVER PREGNANT<br>OR NEVER HAD CHILDREN<br><br>IF NO → 601 |                     | Y          |                    |
| 502                                                                                                                                                                                                                                                                                                                                                                              |             | Have you ever had vaginal sex? This is where a man puts his penis into a woman's vagina. | YES = 1<br>NO = 2<br>DON'T KNOW = 98<br>REFUSED TO SAY = 99 | IF NO → 505                                                                   |                     | Y          | TRACKS TO CORE 601 |



| NO. | VARNA ME | QUESTIONS                                                                                                                     | CODING CATEGORIES                                            | SKIPS/FILTERS                                                            | CORE/SUPPLEMENT | AKAIS ONLY | NOTES              |
|-----|----------|-------------------------------------------------------------------------------------------------------------------------------|--------------------------------------------------------------|--------------------------------------------------------------------------|-----------------|------------|--------------------|
| 503 |          | At what age did you <u>first</u> have vaginal sex?                                                                            | AGE IN YEARS __<br>DON'T KNOW = 98<br>REFUSED TO SAY = 99    |                                                                          |                 | Y          | TRACKS TO CORE 601 |
| 504 |          | Did you use a condom the first time you had vaginal sex?                                                                      | YES = 1<br>NO = 2<br>DON'T KNOW = 98<br>REFUSED TO SAY = 99  |                                                                          | S               |            |                    |
| 505 |          | Some men and women like to have anal sex. This is where a man puts his penis in someone's anus. Have you ever practiced this? | YES = 1<br>NO = 2<br>DON'T KNOW = 98<br>REFUSED TO SAY = 99  | IF NO & 502=1<br>CHECK 501 AND PROBE IF EVER HAD SEX.<br><br>IF NO → 510 | S               |            |                    |
| 506 |          | At what age did you first have anal sex?                                                                                      | AGE IN YEARS __ __<br>DON'T KNOW = 98<br>REFUSED TO SAY = 99 |                                                                          | S               |            |                    |

| NO. | VARNA ME | QUESTIONS                                                                                                                                                                                           | CODING CATEGORIES                                                                         | SKIPS/FILTERS | CORE/SUPPLEMENT | AKAIS ONLY | NOTES |
|-----|----------|-----------------------------------------------------------------------------------------------------------------------------------------------------------------------------------------------------|-------------------------------------------------------------------------------------------|---------------|-----------------|------------|-------|
| 507 |          | The <u>first</u> time you had anal sex, was a condom used?                                                                                                                                          | YES = 1<br>NO = 2<br>DON'T KNOW = 98<br>REFUSED TO SAY = 99                               |               | S               |            |       |
| 508 |          | Have you had anal sex in the last 12 months?                                                                                                                                                        | YES = 1<br>NO = 2<br>DON'T KNOW = 98<br>REFUSED TO SAY = 99                               |               |                 | Y          |       |
| 509 |          | How many <u>different</u> people have you had anal sex in the last 12 months?<br><br>IF NON-NUMERIC ANSWER: PROBE TO GET AN ESTIMATE.<br><br>IF NUMBER OF PARTNERS IS GREATER THAN 95, WRITE ' 95'. | NUMBER OF PARTNERS IN LAST 12 MONTHS ___ ___<br><br>DON'T KNOW = 98<br>REFUSED TO SAY= 99 |               |                 | Y          |       |
| 510 |          | How many <u>different</u> people have you had sex with in your lifetime?<br><br>IF NON-NUMERIC ANSWER: PROBE TO GET AN ESTIMATE.<br><br>IF NUMBER OF PARTNERS IS GREATER THAN 100, WRITE ' 100'.    | NUMBER OF PARTNERS IN LIFETIME ___ ___ ___<br>DON'T KNOW = 998<br>REFUSED TO SAY= 999     |               | S               |            |       |

| NO.                                                                                                                                                                                                                                                                                                                                                                                                                                                                          | VARNA ME | QUESTIONS                                                                                                                                                                                                                         | CODING CATEGORIES                        | SKIPS/FILTERS | CORE/SUPPLEMENT | AKAIS ONLY | NOTES |
|------------------------------------------------------------------------------------------------------------------------------------------------------------------------------------------------------------------------------------------------------------------------------------------------------------------------------------------------------------------------------------------------------------------------------------------------------------------------------|----------|-----------------------------------------------------------------------------------------------------------------------------------------------------------------------------------------------------------------------------------|------------------------------------------|---------------|-----------------|------------|-------|
| <p><b>IF LESS THAN 3 PARTNERS:</b> Now I would like to ask you some questions about the partners you have had sex with in the last 12 months.</p> <p><b>IF 3 OR GREATER:</b> Now I would like to ask you some questions about the LAST 3 partners you have had sex with in the past 12 months.</p> <p><b>TO ALL:</b> Let me assure you again that your answers are completely confidential and will not be told to anyone.</p> <p>REPEAT FOR THE 3 MOST RECENT PARTNERS.</p> |          |                                                                                                                                                                                                                                   |                                          |               |                 |            |       |
| 511                                                                                                                                                                                                                                                                                                                                                                                                                                                                          |          | I would like to ask you for initials of your last partners in last 12 months so I can keep track. You don't have to give me exact initials. First give me the initials of the last person you had sex with in the last 12 months. | INITIALS<br><br>____ _                   |               |                 |            |       |
| 512                                                                                                                                                                                                                                                                                                                                                                                                                                                                          |          | Does <b>(INITIALS)</b> live in this household?                                                                                                                                                                                    | YES = 1<br>NO = 2<br>REFUSED TO SAY = 99 | If NO<br>→514 |                 |            |       |
| 513                                                                                                                                                                                                                                                                                                                                                                                                                                                                          |          | SCAN THE BARCODE FROM THE HOUSEHOLD SCHEDULE OF <b>(INITIALS)</b><br><br>IF THE PERSON IS NOT LISTED IN THE HOUSEHOLD, RECORD '00'.                                                                                               |                                          |               |                 |            |       |

| NO. | VARNA<br>ME | QUESTIONS                                                                                                                                                                                      | CODING CATEGORIES                                                                                                                                                                                                  | SKIPS/FILTE<br>RS | CORE/SUPP<br>LEMENT | AKAIS ONLY | NOTES |
|-----|-------------|------------------------------------------------------------------------------------------------------------------------------------------------------------------------------------------------|--------------------------------------------------------------------------------------------------------------------------------------------------------------------------------------------------------------------|-------------------|---------------------|------------|-------|
| 514 |             | What is your relationship with <b>(INITIALS)</b> ?                                                                                                                                             | HUSBAND/WIFE = 1<br>LIVE-IN PARTNER = 2<br>PARTNER, NOT LIVING WITH<br>RESPONDENT = 3<br>FRIEND/ACQUAINTANCE = 4<br>SEX WORKER = 5<br>SEX WORKER CLIENT =6<br>OTHER = 96<br>DON'T KNOW = 98<br>REFUSED TO SAY = 99 |                   | C                   |            |       |
| 515 |             | What is the sex of this person?                                                                                                                                                                | MALE = 1<br>FEMALE = 2<br>DON'T KNOW = 98<br>REFUSED TO SAY = 99                                                                                                                                                   |                   | C                   |            |       |
| 516 |             | How long has it been since you <u>first</u> had sex with <b>(INITIALS)</b> ?<br><br>IF LESS THAN ONE WEEK RECORD IN DAYS, IF LESS THAN ONE MONTH, RECORD IN WEEKS, OTHERWISE RECORD IN MONTHS. | DAYS: __ __<br>WEEKS: __ __<br>MONTHS: __ __<br>YEARS: __ __<br><br>DON'T KNOW = 98<br>REFUSED TO SAY = 99                                                                                                         |                   | S                   |            |       |
| 517 |             | How old is this person? Please give your best guess.                                                                                                                                           | YEARS ____<br>DON'T KNOW =98<br>REFUSED TO SAY = 99                                                                                                                                                                |                   | C                   |            |       |

| NO. | VARNA<br>ME | QUESTIONS                                                                                                                                                           | CODING CATEGORIES                                                                                                      | SKIPS/FILTE<br>RS                                                                               | CORE/SUPP<br>LEMENT | AKAIS ONLY | NOTES |
|-----|-------------|---------------------------------------------------------------------------------------------------------------------------------------------------------------------|------------------------------------------------------------------------------------------------------------------------|-------------------------------------------------------------------------------------------------|---------------------|------------|-------|
| 518 |             | <p>The last time you had sex with <b>(INITIALS)</b>, did you have oral sex, vaginal sex, or anal sex?</p> <p>TICK ALL THAT APPLY</p> <p>PROBE FOR ALL RESPONSES</p> | <p>ORAL=1<br/> VAGINAL = 2<br/> ANAL = 3<br/> DON'T KNOW =98<br/> REFUSED TO SAY = 99</p>                              |                                                                                                 | S                   |            |       |
| 519 |             | <p>Did you use a condom the last time you had sex with <b>(INITIALS)</b>?</p>                                                                                       | <p>YES = 1<br/> NO = 2<br/> DON'T KNOW = 98<br/> REFUSED TO SAY = 99</p>                                               |                                                                                                 | C                   |            |       |
| 520 |             | <p>In the last 12 months, did you have vaginal sex with <b>(INITIALS)</b> without using a condom?</p>                                                               | <p>YES = 1<br/> NO = 2<br/> NO VAGINAL SEX IN THE LAST 12 MONTHS = 3<br/> DON'T KNOW = 98<br/> REFUSED TO SAY = 99</p> | <p>SKIP IF NEVER HAD VAGINAL SEX (502)</p> <p>SKIP IF REPENDENT IS MALE AND PARTNER IS MALE</p> |                     | Y          |       |

| NO. | VARNA ME | QUESTIONS                                                                                                                                                                                           | CODING CATEGORIES                                                                                    | SKIPS/FILTERS                                    | CORE/SUPPLEMENT | AKAIS ONLY | NOTES |
|-----|----------|-----------------------------------------------------------------------------------------------------------------------------------------------------------------------------------------------------|------------------------------------------------------------------------------------------------------|--------------------------------------------------|-----------------|------------|-------|
| 521 |          | In the last 12 months, did you have anal sex with <b>(INITIALS)</b> without using a condom?                                                                                                         | YES = 1<br>NO = 2<br>NO ANAL SEX IN THE LAST 12 MONTHS = 3<br>DON'T KNOW = 98<br>REFUSED TO SAY = 99 | SKIP IF NEVER HAD ANAL SEX                       |                 | Y          |       |
| 522 |          | In the last 12 months, did you ever use a condom when you had sex with <b>(INITIALS)</b> ?                                                                                                          | YES = 1<br>NO = 2<br>DON'T KNOW = 98<br>REFUSED TO SAY = 99                                          | IF NO, DK, REFUSED<br>→524                       | S               |            |       |
| 523 |          | In the last 12 months, when you had sex with <b>(INITIALS)</b> , did the condom you were using ever break, leak or slip off during sex?                                                             | YES = 1<br>NO = 2<br>DON'T KNOW = 98<br>REFUSED TO SAY = 99                                          |                                                  | S               |            |       |
| 524 |          | Did you have sex with <b>(INITIALS)</b> because they provided you with material support?<br><br>Material support means helping you to pay for things, or giving you gifts or money, or opportunity. | YES = 1<br>NO = 2<br>DON'T KNOW = 98<br>REFUSED TO SAY = 99                                          | SKIP IF SPOUSE<br><br>IF NO, DK, REFUSED<br>→526 | C               |            |       |

| NO. | VARNA<br>ME | QUESTIONS                                                                                                                                                       | CODING CATEGORIES                                                                                                                                                                                                                                               | SKIPS/FILTE<br>RS | CORE/SUPP<br>LEMENT | AKAIS ONLY | NOTES |
|-----|-------------|-----------------------------------------------------------------------------------------------------------------------------------------------------------------|-----------------------------------------------------------------------------------------------------------------------------------------------------------------------------------------------------------------------------------------------------------------|-------------------|---------------------|------------|-------|
| 525 |             | <p>In the <u>last 12 months</u>, what did you receive when you had sex with <b>(INITIALS)</b>?</p> <p>SELECT ALL THAT APPLY.</p> <p>PROBE FOR ALL RESPONSES</p> | <p>MONEY = 1<br/> FOOD = 2<br/> GOOD GRADES = 3<br/> SCHOOL FEES = 4<br/> EMPLOYMENT = 5<br/> GIFTS/FAVORS = 6<br/> TRANSPORT = 7<br/> SHELTER/RENT = 8<br/> PROTECTION = 9<br/> OTHER (SPECIFY) = 96</p> <hr/> <p>DON'T KNOW = 98<br/> REFUSED TO SAY = 99</p> |                   | C                   |            |       |
| 526 |             | <p>Do you expect to have sex with <b>(INITIALS)</b> again?</p>                                                                                                  | <p>YES =1<br/> NO =2<br/> DON'T KNOW = 98<br/> REFUSED TO SAY = 99</p>                                                                                                                                                                                          |                   | C                   |            |       |
| 527 |             | <p>Does <b>(INITIALS)</b> know your HIV status?</p> <p>HIV status could mean you are HIV negative or HIV positive.</p>                                          | <p>YES =1<br/> NO =2<br/> DON'T KNOW = 98<br/> REFUSED TO SAY = 99</p>                                                                                                                                                                                          |                   | C                   |            |       |

| NO. | VARNA ME | QUESTIONS                                                                                                                                                     | CODING CATEGORIES                                                                                                                                                                                                                                                                                                                                        | SKIPS/FILTERS               | CORE/SUPPLEMENT | AKAIS ONLY | NOTES |
|-----|----------|---------------------------------------------------------------------------------------------------------------------------------------------------------------|----------------------------------------------------------------------------------------------------------------------------------------------------------------------------------------------------------------------------------------------------------------------------------------------------------------------------------------------------------|-----------------------------|-----------------|------------|-------|
| 528 |          | Do you know <b>(INITIALS)</b> HIV Status?<br><br>HIV status could mean you are HIV negative or HIV positive                                                   | YES =1<br>NO =2<br>REFUSED TO SAY = 99                                                                                                                                                                                                                                                                                                                   | IF NO,<br>REFUSED<br>→530   |                 | Y          |       |
| 529 |          | What is the HIV status of <b>(INITIALS)</b> ?<br><br>READ REPSONSE ALOUD                                                                                      | I THINK <b>(INITIALS)</b> IS POSITIVE = 1<br><b>(INITIALS)</b> TOLD ME HE/SHE IS POSITIVE = 2<br><b>(INITIALS)</b> IS POSITIVE, TESTED TOGETHER = 3<br>I THINK <b>(INITIALS)</b> IS NEGATIVE = 4<br><b>(INITIALS)</b> TOLD ME HE/SHE IS NEGATIVE = 5<br><b>(INITIALS)</b> IS NEGATIVE, TESTED TOGETHER=6<br>DON'T KNOW STATUS = 98<br>REFUSED TO SAY= 99 |                             | C               |            |       |
| 530 |          | DOES THE RESPONDENT HAVE ANOTHER PARTNER IN THE LAST 12 MONTHS?<br><br>I will now ask you about the person you have had sex with prior to <b>(INITIALS)</b> . | YES=1<br>NO=1                                                                                                                                                                                                                                                                                                                                            | IF YES,<br>REPEAT<br>MODULE | C               |            |       |



**MODULE 6: HIV/AIDS KNOWLEDGE AND ATTITUDES**

| NO. | VARNA<br>ME | QUESTIONS                                                                                                             | CODING CATEGORIES                                            | SKIPS/FILTERS | CORE/SUPPLEM<br>ENT/OPTIONAL | AKAIS ONLY | NOTES |
|-----|-------------|-----------------------------------------------------------------------------------------------------------------------|--------------------------------------------------------------|---------------|------------------------------|------------|-------|
| 601 |             | Can the risk of HIV transmission be reduced by having sex with only one uninfected partner who has no other partners? | YES = 1<br>NO = 2<br>DON'T KNOW = 98<br>REFUSED TO ANSWER=99 |               | 0                            |            |       |
| 602 |             | Can people reduce their risk of getting HIV by using a condom every time they have sex?                               | YES = 1<br>NO = 2<br>DON'T KNOW = 98<br>REFUSED TO SAY=99    |               | 0                            |            |       |
| 603 |             | Can people get HIV from mosquito bites?                                                                               | YES = 1<br>NO = 2<br>DON'T KNOW = 98<br>REFUSED TO SAY=99    |               | 0                            |            |       |
| 604 |             | Can people get HIV by sharing food with a person who has HIV?                                                         | YES = 1<br>NO = 2<br>DON'T KNOW = 98<br>REFUSED TO SAY=99    |               | 0                            |            |       |

| NO. | VARNA ME | QUESTIONS                                                                                                                                       | CODING CATEGORIES                                                     | SKIPS/FILTERS | CORE/SUPPLEMENT/OPTIONAL | AKAIS ONLY | NOTES |
|-----|----------|-------------------------------------------------------------------------------------------------------------------------------------------------|-----------------------------------------------------------------------|---------------|--------------------------|------------|-------|
| 605 |          | Can people get HIV because of witchcraft or other supernatural means?                                                                           | YES = 1<br>NO = 2<br>DON'T KNOW = 98<br>REFUSED TO SAY=99             |               |                          | Y          |       |
| 606 |          | Can a healthy-looking person have HIV?                                                                                                          | YES = 1<br>NO = 2<br>DON'T KNOW = 98<br>REFUSED TO SAY=99             |               | O                        |            |       |
| 607 |          | Would you buy fresh vegetables from a shopkeeper or vendor if you knew that this person had HIV?                                                | YES= 1<br>NO = 2<br>DON'T KNOW = 98<br>REFUSED TO SAY=99              |               |                          |            |       |
| 608 |          | Do you think children living with HIV should be allowed to attend school with children who do not have HIV?                                     | YES = 1<br>NO = 2<br>DON'T KNOW/NOT SURE/DEPENDS = 98<br>REFUSED = 99 |               |                          |            |       |
| 609 |          | Do you think people hesitate to take an HIV test because they are afraid of how other people will react if the test result is positive for HIV? | YES = 1<br>NO = 2<br>DON'T KNOW/NOT SURE/DEPENDS = 98<br>REFUSED = 99 |               |                          |            |       |

| NO. | VARNA ME | QUESTIONS                                                                                                | CODING CATEGORIES                                                                            | SKIPS/FILTERS | CORE/SUPPLEMENT/OPTIONAL | AKAIS ONLY | NOTES |
|-----|----------|----------------------------------------------------------------------------------------------------------|----------------------------------------------------------------------------------------------|---------------|--------------------------|------------|-------|
| 610 |          | Do people talk badly about people who are living with HIV, or who are thought to be living with HIV?     | YES = 1<br>NO = 2<br>DON'T KNOW/NOT SURE/DEPENDS = 98<br>REFUSED = 99                        |               |                          |            |       |
| 611 |          | Do people living with HIV, or thought to be living with HIV, lose the respect of other people?           | YES = 1<br>NO = 2<br>DON'T KNOW/NOT SURE/DEPENDS = 98<br>REFUSED = 99                        |               |                          |            |       |
| 612 |          | Do you fear that you could get HIV if you come into contact with the saliva of a person living with HIV? | YES = 1<br>NO = 2<br>ALREADY HAS HIV = 3<br>DON'T KNOW/NOT SURE/DEPENDS = 98<br>REFUSED = 99 |               |                          |            |       |
| 613 |          | Would you be ashamed if someone in your family had HIV?                                                  | YES= 1<br>NO = 2<br>DON'T KNOW = 98<br>REFUSED TO SAY=99                                     |               |                          |            |       |

## MODULE 7: HIV/AIDS TESTING

| NO. | VARNAME | QUESTIONS                                                                               | CODING CATEGORIES                                                                                                                            | SKIPS/FILTERS                 | CORE/SUPPLEMENT/OPTIONAL | AKAIS ONLY | NOTES |
|-----|---------|-----------------------------------------------------------------------------------------|----------------------------------------------------------------------------------------------------------------------------------------------|-------------------------------|--------------------------|------------|-------|
| 701 |         | Has a health care worker or outreach worker ever talked to you about HIV?               | YES= 1<br>NO = 2<br>DON'T KNOW = 98<br>REFUSE TO SAY=99                                                                                      | IF NO, DK,<br>REFUSED<br>→703 | S                        |            |       |
| 702 |         | When was the last time a health care worker or outreach worker talked to you about HIV? | IN THE LAST 30 DAYS =1<br>IN THE LAST 3 MONTHS= 2<br>IN THE LAST YEAR =3<br>LONGER THAN A YEAR AGO =4<br>DON'T KNOW = 98<br>REFUSE TO SAY=99 |                               | S                        |            |       |
| 703 |         | Have you <u>ever</u> been <b>tested</b> for HIV?                                        | YES = 1<br>NO = 2<br>DON'T KNOW =98<br>REFUSE TO SAY=99                                                                                      | IF YES→705                    | C                        |            |       |
| 704 |         | Why have you never been tested for HIV?<br><br>PROBE: Any other reason?                 | NO KNOWLEDGE ABOUT HIV TEST =1<br>DON'T KNOW WHERE TO GET ONE = 2<br>TEST COSTS TOO MUCH = 3<br>TRANSPORT TO VCT SITE TOO                    | →715                          | C                        |            |       |

| NO. | VARNAME | QUESTIONS                                                                                   | CODING CATEGORIES                                                                                                                                                                                                                                                                                                                                                    | SKIPS/FILTERS | CORE/SUPPLEMENT/OPTIONAL | AKAIS ONLY | NOTES |
|-----|---------|---------------------------------------------------------------------------------------------|----------------------------------------------------------------------------------------------------------------------------------------------------------------------------------------------------------------------------------------------------------------------------------------------------------------------------------------------------------------------|---------------|--------------------------|------------|-------|
|     |         | RECORD ALL MENTIONED.                                                                       | MUCH = 4<br>VCT/HTC SITE TOO FAR AWAY =5<br>AFRAID OTHERS WILL KNOW ABOUT TEST/TEST RESULTS = 6<br>DON'T NEED TEST/LOW RISK = 7<br>AFRAID TO KNOW IF I HAVE HIV =8<br>CAN'T GET TREATMENT IF HAVE HIV =9<br>NEVER BEEN OFFERED A TEST = 10<br>DID NOT RECEIVED PREMISSION FROM SPOUSE/FAMILY=11<br>OTHER (SPECIFY) = 96<br><hr/> DON'T KNOW = 98<br>REFUSE TO SAY=99 |               |                          |            |       |
| 705 |         | Why did you test for HIV?<br><br>PROBE FOR ALL POSSIBLE ANSWERS<br><br>RECORD ALL MENTIONED | HEALTH CARE OR OUTREACH OFFERED TEST=1<br>TESTED DURING ANTENATAL CLINIC VISIT=2<br>I JUST WANTED TO KNOW=3<br>FELT AT RISK OR SICK=4<br>GOT A NEW PARTNER=5<br>OTHER (SPECIFY) = 96<br><hr/> DON'T KNOW =98<br>REFUSE TO SAY=99                                                                                                                                     |               | S                        |            |       |

| NO. | VARNAME | QUESTIONS                            | CODING CATEGORIES                                                                                                                                                                                                                                                                                                                           | SKIPS/FILTERS | CORE/SUPPLEMENT/OPTIONAL | AKAIS ONLY | NOTES |
|-----|---------|--------------------------------------|---------------------------------------------------------------------------------------------------------------------------------------------------------------------------------------------------------------------------------------------------------------------------------------------------------------------------------------------|---------------|--------------------------|------------|-------|
| 706 |         | When was your <u>last</u> HIV test?  | LESS THAN 3 MONTHS AGO =1<br>3-5 MONTHS AGO = 2<br>6-11 MONTHS AGO = 3<br>1-2 YEARS AGO = 4<br>MORE THAN 2 YEARS AGO = 5<br>DON'T KNOW= 98<br>REFUSED TO SAY=99                                                                                                                                                                             |               | C-MODIFIED               |            |       |
| 707 |         | Where was the <u>last</u> test done? | VCT FACILITY = 1<br>MOBILE VCT =2<br>AT HOME = 3<br>HEALTH CLINIC / FACILITY =4<br>HOSPITAL OUT PATIENT CLINIC =5<br>TB CLINIC = 6<br>STI CLINIC = 7<br>HOSPITAL INPATIENT WARDS = 8<br>BLOOD DONATING CENTER = 9<br>FAMILY PLANNING CLINIC = 10<br>ANTENATAL CLINIC=11<br>OTHER (SPECIFY) = 96<br><hr/> DON'T KNOW=98<br>REFUSED TO SAY=99 |               | C                        |            |       |

| NO. | VARNAME | QUESTIONS                                                                                                                                                                                                         | CODING CATEGORIES                                                                                                                                           | SKIPS/FILTERS                                           | CORE/SUPPLEMENT/OPTIONAL | AKAIS ONLY | NOTES |
|-----|---------|-------------------------------------------------------------------------------------------------------------------------------------------------------------------------------------------------------------------|-------------------------------------------------------------------------------------------------------------------------------------------------------------|---------------------------------------------------------|--------------------------|------------|-------|
| 708 |         | What was the result of your <u>last</u> HIV test?                                                                                                                                                                 | POSITIVE=1<br>NEGATIVE=2<br>UNCERTAIN/INDETERMINATE=3<br>DID NOT RECEIVE THE RESULT=4<br>DON'T KNOW=98<br>REFUSED TO SAY=99                                 | If NEG,<br>UNCERT, IND,<br>NO RESULT,<br>DK,<br>REF→715 | C                        |            |       |
| 709 |         | What was the month and year of your first HIV positive test result? Please give your best guess.<br><br>This will be the very first HIV positive test result that you have received.<br><br>PROBE TO VERIFY DATE. | MONTH _____<br>DON'T KNOW MONTH = 8<br>REFUSED MONTH = 9<br><br>YEAR _____<br>DON'T KNOW YEAR = 98<br>REFUSED YEAR = 99                                     |                                                         | C                        |            |       |
| 710 |         | Who have you told that you are HIV positive?<br><br>TICK ALL THAT APPLY.<br><br>PROBE FOR ALL ANSWERS                                                                                                             | NO ONE =1<br>SPOUSE/SEX PARTNER =2<br>DOCTOR =3<br>FRIEND =4<br>FAMILY MEMBER= 5<br>OTHER (SPECIFY) = 96<br><br>_____<br>DON'T KNOW=98<br>REFUSED TO SAY=99 |                                                         | C                        |            |       |

| NO. | VARNAME | QUESTIONS                                                                                                                                                                                          | CODING CATEGORIES                                                                 | SKIPS/FILTERS             | CORE/SUPPLEMENT/OPTIONAL | AKAIS ONLY | NOTES |
|-----|---------|----------------------------------------------------------------------------------------------------------------------------------------------------------------------------------------------------|-----------------------------------------------------------------------------------|---------------------------|--------------------------|------------|-------|
| 711 |         | Have you visited a health facility to see a doctor or health provider in the last 12 months?                                                                                                       | YES = 1<br>NO = 2<br>DON'T KNOW = 98<br>REFUSED TO SAY=99                         | IF NO→713                 | S                        |            |       |
| 712 |         | During any of your visits to the health facility in the last 12 months, did a health provider offer you an HIV test?                                                                               | YES = 1<br>NO = 2<br>DON'T KNOW = 98<br>REFUSED = 99                              |                           | S                        |            |       |
| 713 |         | Have you ever tested yourself for HIV in private using a self-test kit?<br><br>With a self-test kit you can test yourself for HIV at home. There are instructions on how to interpret the results. | YES = 1<br>NO = 2<br>DON'T KNOW = 98<br>REFUSED TO SAY=99                         |                           | S                        |            |       |
| 714 |         | In your lifetime, how many total times have you been tested for HIV?<br><br>PROBE FOR BEST ESTIMATE                                                                                                | NUMBER OF TIMES TESTED FOR HIV<br>— —<br><br>DON'T KNOW = 98<br>REFUSED TO SAY=99 |                           | S                        |            |       |
| 715 |         | What do you think are your chances of getting HIV?<br><br>READ OUT ALL RESPONSES                                                                                                                   | NO RISK AT ALL = 1<br>SMALL = 2<br>MODERATE = 3<br>GREAT = 4                      | IF MODERATE/<br>GREAT→717 |                          | Y          |       |



| NO. | VARNAME | QUESTIONS                                                                                                                          | CODING CATEGORIES                                                                                                                                                                                                                                 | SKIPS/FILTERS | CORE/SUPPLEMENT/OPTIONAL | AKAIS ONLY | NOTES |
|-----|---------|------------------------------------------------------------------------------------------------------------------------------------|---------------------------------------------------------------------------------------------------------------------------------------------------------------------------------------------------------------------------------------------------|---------------|--------------------------|------------|-------|
|     |         |                                                                                                                                    | I ALREADY HAVE HIV = 5<br>DON'T KNOW = 98<br>REFUSED TO SAY=99                                                                                                                                                                                    |               |                          |            |       |
| 716 |         | Why do you think you have no risk/a small chance of getting HIV?<br><br>PROBE FOR ALL POSSIBLE REASONS<br><br>RECORD ALL MENTIONED | NEVER HAD SEX = 1<br>NOT HAVING SEX ANYMORE = 2<br>USES CONDOMS = 3<br>HAS ONLY ONE PARTNER = 4<br>LIMITS NUMBER OF PARTNERS = 5<br>PARTNER HAS NO OTHER PARTNER = 6<br>OTHER (SPECIFY) = 96<br><br>_____<br>DON'T KNOW = 98<br>REFUSED TO SAY=99 | SKIP TO 801   |                          | Y          |       |
| 717 |         | Why do you think you have moderate/great risk of getting HIV?<br><br>PROBE FOR ALL POSSIBLE REASONS<br><br>RECORD ALL MENTIONED    | DOES NOT USE CONDOMS.= 1<br>HAS MORE THAN ONE PARTNER=2<br>PARTNER HAS OTHER PARTNERS =3<br>HOMOSEXUAL CONTACTS=4<br>HAD BLOOD TRANSFUSIONS/<br>INJECTIONS=5<br>OTHER (SPECIFY) = 96<br><br>_____<br>DON'T KNOW = 98<br>REFUSED TO SAY=99         |               |                          | Y          |       |

**MODULE 8: HIV STATUS, CARE AND TREATMENT**

| NO.                                                                                        | VARNAME | QUESTIONS                                                                                                                  | CODING CATEGORIES                                                                                                                                                                                                                                                                                                                                                               | SKIPS/FILTERS                                    | CORE/SUP-<br>PLE-<br>MENT/OP-<br>TIONAL | AKAIS<br>ONLY | NOTES |
|--------------------------------------------------------------------------------------------|---------|----------------------------------------------------------------------------------------------------------------------------|---------------------------------------------------------------------------------------------------------------------------------------------------------------------------------------------------------------------------------------------------------------------------------------------------------------------------------------------------------------------------------|--------------------------------------------------|-----------------------------------------|---------------|-------|
| Now I'm going to ask you more about your experience with HIV support, care, and treatment. |         |                                                                                                                            |                                                                                                                                                                                                                                                                                                                                                                                 | SKIP IF NOT HIV<br>POSITIVE (FROM<br>708) TO 901 |                                         |               |       |
| 801                                                                                        |         | After learning of your HIV diagnosis, have you <u>ever</u> received HIV medical care from a health care provider?          | YES = 1<br>NO = 2<br>DON'T KNOW = 98<br>REFUSED TO SAY = 99                                                                                                                                                                                                                                                                                                                     | IF YES → 803                                     |                                         | C             |       |
| 802                                                                                        |         | What is the <u>main</u> reason why you have never seen a health care provider for HIV medical care?<br><br>SELECT ONLY ONE | THE FACILITY IS TOO FAR AWAY = 1<br>I DON'T KNOW WHERE TO GET HIV MEDICAL CARE = 2<br>COST OF CARE = 3<br>COST OF TRANSPORT = 4<br>I FEEL HEALTHY/NOT SICK = 5<br>I FEAR PEOPLE WILL KNOW THAT I HAVE HIV IF I GO TO A CLINIC = 6<br>I'M TAKING TRADITIONAL MEDICINE= 7<br>RELIGIOUS REASONS = 8<br>OTHER (SPECIFY) = 96<br><br>_____<br>DON'T KNOW = 98<br>REFUSED TO SAY = 99 | → 901                                            |                                         | C             |       |

| NO. | VARNAME | QUESTIONS                                                                                                                    | CODING CATEGORIES                                                                                                                                | SKIPS/FILTERS                          | CORE/SUP-<br>PLE-<br>MENT/OP-<br>TIONAL | AKAIS<br>ONLY | NOTES |
|-----|---------|------------------------------------------------------------------------------------------------------------------------------|--------------------------------------------------------------------------------------------------------------------------------------------------|----------------------------------------|-----------------------------------------|---------------|-------|
| 803 |         | After learning your HIV diagnosis, what month and year did you <u>first</u> see a health care provider for HIV medical care? | MONTH ____ ____<br>DON'T KNOW =98<br>REFUSE TO SAY=99<br><br>YEAR ____ ____ ____ ____<br>DON'T KNOW=9998<br>REFUSED TO SAY=9999                  |                                        | C                                       |               |       |
| 804 |         | How many months or years has it been since you <u>last</u> saw a health care provider for HIV medical care?                  | MONTH ____ ____<br>DON'T KNOW MONTH = 98<br>REFUSED TO SAY= 99<br><br>YEAR ____ ____<br>DON'T KNOW YEAR =9998<br>REFUSED TO SAY = 9999           | IF LAST MEDICAL VISIT ≥2 MONTHS, →806. | C                                       |               |       |
| 805 |         | Following your last appointment, what is the date of your next scheduled visit?                                              | MONTH ____ ____<br>DON'T KNOW MONTH = 98<br>REFUSED TO SAY= 99<br><br>YEAR ____ ____ ____ ____<br>DON'T KNOW YEAR =9998<br>REFUSED TO SAY = 9999 |                                        |                                         | Y             |       |

| NO. | VARNAME | QUESTIONS                                                                                                                                      | CODING CATEGORIES                                                                                                                                                                                                                                                                                                                                                                                                                                                                              | SKIPS/FILTERS | CORE/SUP-<br>PLE-<br>MENT/OP-<br>TIONAL | AKAIS<br>ONLY | NOTES |
|-----|---------|------------------------------------------------------------------------------------------------------------------------------------------------|------------------------------------------------------------------------------------------------------------------------------------------------------------------------------------------------------------------------------------------------------------------------------------------------------------------------------------------------------------------------------------------------------------------------------------------------------------------------------------------------|---------------|-----------------------------------------|---------------|-------|
| 806 |         | <p>What is the <u>main</u> reason for not seeing a health care provider for HIV medical care since your last visit?</p> <p>SELECT ONLY ONE</p> | <p>THE FACILITY IS TOO FAR AWAY = 1<br/>           I DON'T KNOW WHERE TO GET HIV MEDICAL CARE = 2<br/>           COST OF CARE = 3<br/>           COST OF TRANSPORT = 4<br/>           I FEEL HEALTHY/NOT SICK = 5<br/>           I FEAR PEOPLE WILL KNOW THAT I HAVE HIV IF I GO TO A CLINIC = 6<br/>           I'M TAKING TRADITIONAL MEDICINE= 7<br/>           RELIGIOUS REASONS = 8<br/>           OTHER (SPECIFY) = 96</p> <hr/> <p>DON'T KNOW = 98<br/>           REFUSED TO SAY= 99</p> |               | C                                       |               |       |
| 807 |         | <p>Approximately how long does it take you to travel from your home (or workplace) to see a health care provider?</p>                          | <p>LESS THAN ONE HOUR = 1<br/>           ONE TO TWO HOURS = 2<br/>           MORE THAN TWO HOURS = 3<br/>           DON'T KNOW = 98<br/>           REFUSED TO SAY= 99</p>                                                                                                                                                                                                                                                                                                                      |               | S                                       |               |       |

| NO. | VARNAME | QUESTIONS                                                                                                                                           | CODING CATEGORIES                                                                                                                  | SKIPS/FILTERS                                                                                  | CORE/SUP-<br>PLE-<br>MENT/OP-<br>TIONAL | AKAIS<br>ONLY | NOTES |
|-----|---------|-----------------------------------------------------------------------------------------------------------------------------------------------------|------------------------------------------------------------------------------------------------------------------------------------|------------------------------------------------------------------------------------------------|-----------------------------------------|---------------|-------|
| 808 |         | Approximately how much does it cost to travel from your home (or workplace) to the clinic?                                                          | COST _____<br>DON'T KNOW = 98<br>REFUSED = 99                                                                                      | USE LOCAL CURRENCY (i.e. Nigerian Naira).                                                      | S                                       |               |       |
| 809 |         | Have you ever had a CD4 count test?<br><br>The CD4 count tells you how sick you are with HIV and if you need to take ARVs or other HIV medications. | YES = 1<br>NO = 2<br>DON'T KNOW = 98<br>REFUSED = 99                                                                               | NO, DK, REFUSED → 811<br><br>NO, DK, REFUSED & NEVER IN HIV CARE (801) → SKIP TO END OF MODULE |                                         |               |       |
| 810 |         | What month and year were you last tested for your CD4 count?                                                                                        | MONTH ____ ____<br>DON'T KNOW MONTH = 98<br>REFUSED MONTH = 99<br>YEAR ____ ____ ____<br>DON'T KNOW YEAR = 98<br>REFUSED YEAR = 99 | SKIP TO END OF MODULE IF NEVER IN HIV CARE (801).                                              |                                         |               |       |
| 811 |         | Have you <u>ever</u> taken ARVs, that is, antiretroviral medications or HIV medications, to treat HIV infection?                                    | YES = 1<br>NO = 2<br>DON'T KNOW = 98<br>REFUSED TO SAY = 99                                                                        | IF YES → 813                                                                                   | C                                       |               |       |

| NO. | VARNAME | QUESTIONS                                                                                                  | CODING CATEGORIES                                                                                                                                                                                                                                                                                                                                                                                    | SKIPS/FILTERS | CORE/SUP-<br>PLE-<br>MENT/OP-<br>TIONAL | AKAIS<br>ONLY | NOTES |
|-----|---------|------------------------------------------------------------------------------------------------------------|------------------------------------------------------------------------------------------------------------------------------------------------------------------------------------------------------------------------------------------------------------------------------------------------------------------------------------------------------------------------------------------------------|---------------|-----------------------------------------|---------------|-------|
| 812 |         | <p>What is the <u>main</u> reason you have never taken ARVs or HIV medications?</p> <p>SELECT ONLY ONE</p> | <p>NOT ELIGIBLE FOR TREATMENT=1<br/> HEALTH CARE PROVIDER DID NOT PRESCRIBE = 2<br/> HIV MEDICINES NOT AVAILABLE = 3<br/> I FEEL HEALTHY/NOT SICK = 4<br/> COST OF MEDICATIONS = 5<br/> COST OF TRANSPORT = 6<br/> RELIGIOUS REASONS = 7<br/> TAKING TRADITIONAL MEDICATIONS = 8<br/> NOT ATTENDING HIV CLINIC = 9<br/> OTHER (SPECIFY) = 96</p> <hr/> <p>DON'T KNOW = 98<br/> REFUSED TO SAY=99</p> | →819          | C                                       |               |       |
| 813 |         | <p>When did you first start taking ARVs or HIV medications?</p>                                            | <p>MONTH ____</p> <p>DON'T KNOW =98<br/> REFUSE TO SAY=99</p> <p>YEAR _____</p> <p>DON'T KNOW=9998<br/> REFUSED TO SAY=9999</p>                                                                                                                                                                                                                                                                      |               | C                                       |               |       |

| NO. | VARNAME | QUESTIONS                                                                                                                                                                                | CODING CATEGORIES                                                                                                                                                                                                                                                                                                                                                                              | SKIPS/FILTERS | CORE/SUP-<br>PLE-<br>MENT/OP-<br>TIONAL | AKAIS<br>ONLY | NOTES |
|-----|---------|------------------------------------------------------------------------------------------------------------------------------------------------------------------------------------------|------------------------------------------------------------------------------------------------------------------------------------------------------------------------------------------------------------------------------------------------------------------------------------------------------------------------------------------------------------------------------------------------|---------------|-----------------------------------------|---------------|-------|
| 814 |         | Are you <u>currently</u> taking ARVs, that is, antiretroviral medications or HIV medications?                                                                                            | YES = 1<br>NO=2<br>DON'T KNOW = 98<br>REFUSED TO SAY = 99                                                                                                                                                                                                                                                                                                                                      | IF YES → 816  | C                                       |               |       |
| 815 |         | Can you tell me the <u>main</u> reason why you are <u>not</u> taking ARVs, antiretroviral medications or HIV medications?<br><br>PROBE FOR THE <b>MAIN</b> REASON<br><br>SELECT ONLY ONE | I HAVE TROUBLE TAKING A TABLET EVERYDAY =1<br>I HAD SIDE EFFECTS =2<br>FACILITY TOO FAR AWAY FOR ME TO GET MEDICINE REGULARLY = 3<br>COST OF MEDICATIONS =4<br>COST OF TRANSPORT = 5<br>I FEEL HEALTHY/NOT SICK =6<br>FACILITY WAS OUT OF STOCK =7<br>RELIGIOUS REASONS =8<br>TAKING TRADITIONAL MEDICATIONS = 9<br>OTHER (SPECIFY) = 96<br><br>_____<br>DON' T KNOW = 98<br>REFUSED TO SAY=99 | → 819         | C                                       |               |       |
| 816 |         | People sometimes forget to take their ARVs. In the past 30 days, how many days have you missed                                                                                           | DAYS _____<br>DON'T KNOW = 98<br>REFUSED TO SAY = 99                                                                                                                                                                                                                                                                                                                                           |               | C                                       |               |       |

| NO. | VARNAME | QUESTIONS                                                                                               | CODING CATEGORIES                                                                                                               | SKIPS/FILTERS               | CORE/SUP-<br>PLE-<br>MENT/OP-<br>TIONAL | AKAIS<br>ONLY | NOTES |
|-----|---------|---------------------------------------------------------------------------------------------------------|---------------------------------------------------------------------------------------------------------------------------------|-----------------------------|-----------------------------------------|---------------|-------|
|     |         | taking any of your ARV pills (HIV medications)?                                                         |                                                                                                                                 |                             |                                         |               |       |
| 817 |         | In the past 7 days, how many days have you missed taking any of your ARV pills (HIV medications)?       | DAYS _____<br>DON'T KNOW = 98<br>REFUSED TO SAY =9 9                                                                            |                             |                                         | Y             |       |
| 818 |         | Did you take all your ARV pills yesterday?                                                              | YES = 1<br>NO = 2<br>DON'T KNOW = 98<br>REFUSED TO SAY =99                                                                      |                             |                                         | Y             |       |
| 819 |         | Did you ever have a viral load test?<br><br>This is a test that measures how much HIV is in your blood. | YES= 1<br>NO= 2<br>DON'T KNOW =98<br>REFUSED TO SAY =99                                                                         | IF NO, DK, REFUSED<br>→ 822 | S                                       |               |       |
| 820 |         | When did you last have a viral load test?                                                               | MONTH ____ ____<br>DON'T KNOW =98<br>REFUSE TO SAY=99<br><br>YEAR ____ ____ ____ ____<br>DON'T KNOW=9998<br>REFUSED TO SAY=9999 |                             | S                                       |               |       |



| NO. | VARNAME | QUESTIONS                                                                                                                | CODING CATEGORIES                                                                                                                                                                                                                                                                                                                                              | SKIPS/FILTERS                                                                         | CORE/SUP-<br>PLE-<br>MENT/OP-<br>TIONAL | AKAIS<br>ONLY | NOTES |
|-----|---------|--------------------------------------------------------------------------------------------------------------------------|----------------------------------------------------------------------------------------------------------------------------------------------------------------------------------------------------------------------------------------------------------------------------------------------------------------------------------------------------------------|---------------------------------------------------------------------------------------|-----------------------------------------|---------------|-------|
| 821 |         | Were you told the result of your viral load test?                                                                        | YES= 1<br>NO= 2<br>DON'T KNOW = 98<br>REFUSED TO SAY = 99                                                                                                                                                                                                                                                                                                      |                                                                                       | S                                       |               |       |
| 822 |         | Are you <u>currently</u> taking Septrin or cotrim?                                                                       | YES = 1<br>NO=2<br>DON'T KNOW = 98<br>REFUSED TO SAY = 99                                                                                                                                                                                                                                                                                                      | IF YES, DK, REFUSED<br>→ 824<br><br>SHOW GRAPHIC OF<br>SEPTRIN OR COTRI-<br>MOXAZOLE. | S                                       |               |       |
| 823 |         | Can you tell me the <u>main</u> reason why you are not <u>currently</u> taking Septrin or cotrim?<br><br>SELECT ONLY ONE | NOT BEEN PRESCRIBED= 1<br>I HAVE TROUBLE TAKING A TABLET EVERYDAY = 2<br>I HAD SIDE EFFECTS/RASH = 3<br>FACILITY TOO FAR AWAY FOR ME TO GET SEPTRIN OR COTRIMOXAZOLE REGULARLY = 4<br>COST OF MEDICATIONS = 5<br>COST OF TRANSPORT = 6<br>FEEL HEALTHY/NOT SICK =<br>FACILITY WAS OUT OF STOCK = 7<br>DOCTOR SAID NO LONGER NEEDED = 8<br>OTHER (SPECIFY) = 96 |                                                                                       | S                                       |               |       |

| NO. | VARIABLE | QUESTIONS                                                                                                        | CODING CATEGORIES                                                                                                                                                             | SKIPS/FILTERS               | CORE/SUPPLEMENT/OPTIONAL | AKAIS ONLY | NOTES |
|-----|----------|------------------------------------------------------------------------------------------------------------------|-------------------------------------------------------------------------------------------------------------------------------------------------------------------------------|-----------------------------|--------------------------|------------|-------|
|     |          |                                                                                                                  | DON'T KNOW = 98<br>REFUSED TO SAY = 99                                                                                                                                        |                             |                          |            |       |
| 824 |          | In the last 12 months, how often did a health care provider weigh you?                                           | EVERY VISIT = 1<br>SOME VISITS = 2<br>NEVER = 3<br>DON'T KNOW = 98<br>REFUSED TO SAY = 99                                                                                     | IF NEVER, DK, REFUSED → 827 | S                        |            |       |
| 825 |          | In the last 12 months, were you told by your health care provider that you were underweight or had a low weight? | YES = 1<br>NO = 2<br>DON'T KNOW = 98<br>REFUSED TO SAY = 99                                                                                                                   | IF NO, DK, REFUSED → 827    | S                        |            |       |
| 826 |          | Were you given a nutritional supplement or referred for a nutritional consult?                                   | NO, NEVER GIVEN SUPPLEMENT/REFERRED = 1<br>YES, GIVEN SUPPLEMENT = 2<br>YES, REFERRED = 3<br>BOTH GIVEN SUPPLEMENT AND REFERRED = 4<br>DON'T KNOW = 98<br>REFUSED TO SAY = 99 |                             | S                        |            |       |

| NO. | VARNAME | QUESTIONS                                                                                                                | CODING CATEGORIES                                                                                                                                                                                                                                                                                                                                                                    | SKIPS/FILTERS               | CORE/SUP-<br>PLE-<br>MENT/OP-<br>TIONAL | AKAIS<br>ONLY | NOTES |
|-----|---------|--------------------------------------------------------------------------------------------------------------------------|--------------------------------------------------------------------------------------------------------------------------------------------------------------------------------------------------------------------------------------------------------------------------------------------------------------------------------------------------------------------------------------|-----------------------------|-----------------------------------------|---------------|-------|
| 827 |         | Have you ever attended a support group for HIV-positive people?                                                          | YES = 1<br>NO=2<br>DON'T KNOW = 98<br>REFUSED TO SAY=99                                                                                                                                                                                                                                                                                                                              | IF NO, DK, REFUSED<br>→ 900 | S                                       |               |       |
| 828 |         | In the last 12 months, how many times did you attend a support group?                                                    | CODE 00 IF NONE<br>NUMBER OF TIMES _____<br>DON'T KNOW = 98<br>REFUSED TO SAY = 99                                                                                                                                                                                                                                                                                                   |                             |                                         |               |       |
| 829 |         | Which of the following do you receive from the support group related to your HIV infection?<br><br>CHECK ALL THAT APPLY. | POSITIVE LIVING MESSAGES = 1<br>INFORMATION ABOUT HIV SERVICES = 2<br>REMINDED OF IMPORTANCE OF TAKING ARV REGULARLY = 3<br>REMINDED TO KEEP HIV APPOINTMENTS = 4<br>REFILLS OF ART MEDICATION = 5<br>HOME-BASED CARE = 6<br>PICKING UP ARV MEDICATIONS = 7<br>PSYCHOSOCIAL SUPPORT = 8<br>LIVELIHOOD/MATERIAL SUPPORT = 9<br>NOTHING = 10<br>DON'T KNOW = 98<br>REFUSED TO SAY = 99 |                             | S                                       |               |       |

| NO. | VARNAME | QUESTIONS                                                                                                                                                                                                                                                                        | CODING CATEGORIES                                                                                 | SKIPS/FILTERS                       | CORE/SUP-<br>PLE-<br>MENT/OP-<br>TIONAL | AKAIS<br>ONLY | NOTES |
|-----|---------|----------------------------------------------------------------------------------------------------------------------------------------------------------------------------------------------------------------------------------------------------------------------------------|---------------------------------------------------------------------------------------------------|-------------------------------------|-----------------------------------------|---------------|-------|
| 830 |         | At the last HIV care visit, were you asked if you had any of the following: cough, fever, night sweats, or weight loss?                                                                                                                                                          | YES = 1<br>NO = 2<br>DON'T KNOW = 98<br>REFUSED TO SAY = 99                                       |                                     |                                         |               |       |
| 831 |         | In the last 12 months, have you experienced the following: cough, fever, night sweats and weight loss?                                                                                                                                                                           | YES = 1<br>NO = 2<br>DON'T KNOW = 98<br>REFUSED TO SAY = 99                                       | IF NO, DK, REFUSED<br>→ NEXT MODULE |                                         |               |       |
| 832 |         | The last time you experienced any of the four symptoms (cough, fever, night sweats, weight loss), were any of the following tests done to look for TB?<br><br><i>A sputum test is when the patient has to cough and collect the sample in a cup.</i><br><br>CHECK ALL THAT APPLY | CHEST X-RAY = 1<br>SPUTUM TEST = 2<br>NONE OF THESE = 3<br>DON'T KNOW = 98<br>REFUSED TO SAY = 99 |                                     |                                         |               |       |

| NO. | VARNAME | QUESTIONS                                                                                 | CODING CATEGORIES                                                                  | SKIPS/FILTERS                                                          | CORE/SUP-<br>PLE-<br>MENT/OP-<br>TIONAL | AKAIS<br>ONLY | NOTES |
|-----|---------|-------------------------------------------------------------------------------------------|------------------------------------------------------------------------------------|------------------------------------------------------------------------|-----------------------------------------|---------------|-------|
| 833 |         | In the last 12 months, have you ever been given Isoniazid (INH) to prevent developing TB? | YES = 1<br>NO = 2<br>DON'T KNOW = 98<br>REFUSED TO SAY = 99                        | IF NO,DK, REFUSED<br>→NEXT MODULE<br><br>SHOW GRAPHIC OF<br>ISONIAZID. |                                         |               |       |
| 834 |         | How many months did you take INH?                                                         | MONTHS ____<br>CURRENTLY TAKING INH = 96<br>DON'T KNOW = 98<br>REFUSED TO SAY = 99 |                                                                        |                                         |               |       |

## MODULE 9: TUBERCULOSIS AND OTHER HEALTH ISSUES

| Now I will ask you about tuberculosis or TB. |  |                                                                                 |                                                      |                             |  |  |  |
|----------------------------------------------|--|---------------------------------------------------------------------------------|------------------------------------------------------|-----------------------------|--|--|--|
| 900                                          |  | Have you ever visited a clinic for TB diagnosis or treatment?                   | YES = 1<br>NO=2<br>DON'T KNOW = 98<br>REFUSED = 99   | IF NO, DK, RE-<br>FUSE→1001 |  |  |  |
| 901                                          |  | Have you ever been told by a doctor, clinical officer or nurse that you had TB? | YES = 1<br>NO=2<br>DON'T KNOW = 98<br>REFUSED = 99   |                             |  |  |  |
| 902                                          |  | Were you <u>ever</u> treated for TB?                                            | YES = 1<br>NO = 2<br>DON'T KNOW = 98<br>REFUSED = 99 |                             |  |  |  |
| 903                                          |  | Are you currently on treatment for TB?                                          | YES = 1<br>NO = 2<br>DON'T KNOW = 98<br>REFUSED = 99 |                             |  |  |  |

|                                                                                                                                                                                                                                                                                                                                                                                                                                                                                                                                                                                              |  |                                                                                         |                                                                                                                                 |                                                                |   |  |  |
|----------------------------------------------------------------------------------------------------------------------------------------------------------------------------------------------------------------------------------------------------------------------------------------------------------------------------------------------------------------------------------------------------------------------------------------------------------------------------------------------------------------------------------------------------------------------------------------------|--|-----------------------------------------------------------------------------------------|---------------------------------------------------------------------------------------------------------------------------------|----------------------------------------------------------------|---|--|--|
| 904                                                                                                                                                                                                                                                                                                                                                                                                                                                                                                                                                                                          |  | The last time you were treated for TB, did you complete at least 6 months of treatment? | YES = 1<br>NO =2<br>DON'T KNOW = 98<br>REFUSED = 99                                                                             |                                                                |   |  |  |
| <p><b>FOR FEMALE RESPONDENTS ONLY</b></p> <p>Now I'm going to ask you about tests a health care provider can do to check for cervical cancer. The cervix connects the uterus to the vagina. The tests a health care provider can do to check for cervical cancer are called a Pap smear, HPV test and VIA test.</p> <p>For a Pap smear and HPV test, a health care provider puts a small stick inside the vagina to wipe the cervix and sends the sample to the laboratory. For a VIA test, a healthcare worker puts vinegar on the cervix and looks to see if the cervix changes color.</p> |  |                                                                                         |                                                                                                                                 |                                                                |   |  |  |
| 905                                                                                                                                                                                                                                                                                                                                                                                                                                                                                                                                                                                          |  | Have you ever been tested for cervical cancer?                                          | YES = 1<br>NO = 2<br>DON'T KNOW = 98<br>REFUSED TO SAY = 99                                                                     | IF NO, DK, REFUSED<br>→ SKIP TO NEXT<br>MODULE<br>FEMALE ONLY. | S |  |  |
| 906                                                                                                                                                                                                                                                                                                                                                                                                                                                                                                                                                                                          |  | When was your last test for cervical cancer?                                            | MONTH ____ ____<br>DON'T KNOW =98<br>REFUSE TO SAY=99<br><br>YEAR ____ ____ ____ ____<br>DON'T KNOW=9998<br>REFUSED TO SAY=9999 | FEMALE ONLY                                                    | S |  |  |

|     |  |                                                                     |                                                                                                                                                                                           |                                                  |   |  |  |
|-----|--|---------------------------------------------------------------------|-------------------------------------------------------------------------------------------------------------------------------------------------------------------------------------------|--------------------------------------------------|---|--|--|
| 907 |  | What was the result of your last test for cervical cancer?          | NORMAL = 1<br>ABNORMAL = 2<br>DON'T KNOW = 98<br>REFUSED TO SAY = 99                                                                                                                      | If 1 / 98/ 99 →NEXT<br>MODULE<br><br>FEMALE ONLY | S |  |  |
| 908 |  | Did you receive treatment after your last test for cervical cancer? | YES, I WAS TREATED ON THE SAME DAY = 1<br>YES, I RECEIVED TREATMENT ON A DIFFERENT DAY = 2<br>NO, DID NOT RECEIVE TREATMENT = 3<br>REFERRED = 4<br>DON'T KNOW = 98<br>REFUSED TO SAY = 99 | FEMALE ONLY                                      | S |  |  |



**MODULE 10: BLOOD SAFETY AND MEDICAL INJECTIONS**

| NO.  | VARNAM<br>E | QUESTIONS                                                                    | CODING CATEGORIES                                                                                           | SKIPS/FILTERS                | CORE/SU<br>PPEME<br>NT/OPTI<br>ONAL | AKAIS<br>ONLY | NOTES |
|------|-------------|------------------------------------------------------------------------------|-------------------------------------------------------------------------------------------------------------|------------------------------|-------------------------------------|---------------|-------|
| 1001 |             | Have you ever had a blood transfusion?                                       | YES = 1<br>NO = 2<br>DON'T KNOW = 98<br>REFUSED TO SAY=99                                                   | IF NO, DK,<br>REFUSED → 1003 |                                     | Y             |       |
| 1002 |             | In what month and year was the <u>last</u> time you had a blood transfusion? | MONTH ____<br>DON'T KNOW =98<br>REFUSE TO SAY=99<br><br>YEAR ____<br>DON'T KNOW=9998<br>REFUSED TO SAY=9999 |                              |                                     | Y             |       |
| 1003 |             | Have you <u>ever</u> donated blood?                                          | YES = 1<br>NO = 2<br>DON'T KNOW = 98<br>REFUSED TO SAY=99                                                   | IF NO, DK, REFUSED<br>→ 1011 |                                     | Y             |       |

| NO.  | VARNAM E | QUESTIONS                                                                                       | CODING CATEGORIES                                                                                                                                                  | SKIPS/FILTERS                            | CORE/SU<br>PPEME<br>NT/OPTI<br>ONAL | AKAIS<br>ONLY | NOTES |
|------|----------|-------------------------------------------------------------------------------------------------|--------------------------------------------------------------------------------------------------------------------------------------------------------------------|------------------------------------------|-------------------------------------|---------------|-------|
| 1004 |          | Have you donated blood in the <u>last 12 months</u> ?                                           | YES = 1<br>NO = 2<br>DON'T KNOW = 98<br>REFUSED TO SAY=99                                                                                                          | IF NO, DK, REFUSED<br>→ 1010             |                                     | Y             |       |
| 1005 |          | How many times did you donate blood in the last 12 months?                                      | NUMBER OF TIMES: ____<br><br>DON'T KNOW = 98<br>REFUSED TO SAY=99                                                                                                  |                                          |                                     | Y             |       |
| 1006 |          | The <u>last</u> time you donated blood, were you asked to donate or did you donate voluntarily? | WAS ASKED TO DONATE = 1<br>DONATED VOLUNTARILY = 2<br>DON'T KNOW = 98<br>REFUSED TO SAY=99                                                                         | IF 2, DK (98),<br>REFUSED (99) →<br>1008 |                                     | Y             |       |
| 1007 |          | Who <u>asked</u> you to donate blood the last time?                                             | FAMILY / FRIENDS = 1<br>NATIONAL BLOOD TRANSFUSION SERVICE (NBTS) = 2<br>HOSPITAL = 3<br>OTHER (SPECIFY) = 96<br><br>_____<br>DON'T KNOW = 98<br>REFUSED TO SAY=99 |                                          |                                     | Y             |       |

| NO.  | VARNAM<br>E | QUESTIONS                                                                                        | CODING CATEGORIES                                                                                                                                                                                                                                                                                                                                                                                  | SKIPS/FILTERS | CORE/SU<br>PPLEME<br>NT/OPTI<br>ONAL | AKAIS<br>ONLY | NOTES |
|------|-------------|--------------------------------------------------------------------------------------------------|----------------------------------------------------------------------------------------------------------------------------------------------------------------------------------------------------------------------------------------------------------------------------------------------------------------------------------------------------------------------------------------------------|---------------|--------------------------------------|---------------|-------|
| 1008 |             | Where was your <u>last</u> blood donation made?                                                  | MOBILE DRIVE (SCHOOL, COLLEGE, CHURCH, WORKPLACE, PUBLIC GATHERING) = 1<br>NIGERIA NATIONAL TRANFUSION CENTER = 2<br>PUBLIC HOSPITAL = 3<br>MISSION HOSPITAL = 4<br>PRIVATE HOSPITAL = 5<br>OTHER (SPECIFY) = 96<br><br>_____<br>DON'T KNOW = 98<br>REFUSED TO SAY=99                                                                                                                              |               |                                      | Y             |       |
| 1009 |             | What was the <u>main</u> reason you donated blood this <u>last time</u> ?<br><br>SELECT ONLY ONE | IN RESPONSE TO PUBLIC REQUESTS FOR BLOOD DONORS (CIVIC/ALTRUISTIC REASONS) = 1<br>AS PART OF A BLOOD COLLECTION DRIVE (THERE WAS A BLOOD DRIVE WHERE I WORK, GO TO SCHOOL, SHOP) = 2<br>SPECIFICALLY FOR A FAMILY MEMBER OR FRIEND = 3<br>AS PART OF A BLOOD DONOR CLUB = 4<br>IN EXCHANGE FOR COMPENSATION (FROM A FRIEND OR FAMILY) = 5<br>I AM A REGULAR DONOR = 6<br>TO KNOW MY HIV STATUS = 7 |               |                                      | Y             |       |

| NO.  | VARNAM E | QUESTIONS                                                                                                                                                                   | CODING CATEGORIES                                                     | SKIPS/FILTERS                               | CORE/SU<br>PPEME<br>NT/OPTI<br>ONAL | AKAIS<br>ONLY | NOTES |
|------|----------|-----------------------------------------------------------------------------------------------------------------------------------------------------------------------------|-----------------------------------------------------------------------|---------------------------------------------|-------------------------------------|---------------|-------|
|      |          |                                                                                                                                                                             | OTHER (SPECIFY) = 96<br>_____<br>DON'T KNOW = 98<br>REFUSED TO SAY=99 |                                             |                                     |               |       |
| 1010 |          | Are you planning to donate blood in the future?                                                                                                                             | YES = 1<br>NO = 2<br>DON'T KNOW = 98<br>REFUSED TO SAY=99             |                                             |                                     | Y             |       |
| 1011 |          | Now I would like to ask you some questions about any injections you have had in the last 12 months. Have you had an injection for any reason in the <u>last 12 months</u> ? | YES = 1<br>NO = 2<br>DON'T KNOW = 98<br>REFUSED TO SAY=99             | IF NO, DK,<br>REFUSED → 1101<br>NEXT MODULE |                                     | Y             |       |
| 1012 |          | Have you had an injection in the <u>last 12 months</u> that was administered by a doctor, a clinical officer, a nurse, a pharmacist, a dentist, or any other health worker? | YES = 1<br>NO = 2<br>DON'T KNOW = 98<br>REFUSED TO SAY=99             | IF NO, DK, REFUSED<br>→1015                 |                                     | Y             |       |

| NO.  | VARNAM<br>E | QUESTIONS                                                                                                                                                                                      | CODING CATEGORIES                                                               | SKIPS/FILTERS                       | CORE/SU<br>PPLEME<br>NT/OPTI<br>ONAL | AKAIS<br>ONLY | NOTES |
|------|-------------|------------------------------------------------------------------------------------------------------------------------------------------------------------------------------------------------|---------------------------------------------------------------------------------|-------------------------------------|--------------------------------------|---------------|-------|
| 1013 |             | <p>How many injections did you have?</p> <p>IF NUMBER OF INJECTIONS IS GREATER THAN 90, OR DAILY FOR 3 MONTHS OR MORE, RECORD '90'.</p> <p>IF NON-NUMERIC ANSWER, PROBE TO GET AN ESTIMATE</p> | <p>NUMBER OF INJECTIONS: __ __</p> <p>DON'T KNOW = 98<br/>REFUSED TO DAY=99</p> |                                     |                                      | Y             |       |
| 1014 |             | <p>The last time you received an injection from a health worker, did the health worker take the syringe and needle from a new, unopened package?</p>                                           | <p>YES = 1<br/>NO=2<br/>DON'T KNOW = 98<br/>REFUSED TO SAY=99</p>               |                                     |                                      | Y             |       |
| 1015 |             | <p>Have you had an injection in the last 12 months that was administered by a traditional practitioner or healer?</p>                                                                          | <p>YES = 1<br/>NO=2<br/>DON'T KNOW = 98<br/>REFUSED TO SAY=99</p>               | <p>If NO, DK, REFUSED<br/>→1017</p> |                                      | Y             |       |
| 1016 |             | <p>In the last 12 months, have you <u>given yourself</u> an injection that was prescribed by a doctor, a clinical officer, a nurse, a pharmacist, a dentist, or any other health worker?</p>   | <p>YES = 1<br/>NO=2<br/>DON'T KNOW = 98<br/>REFUSED TO SAY=99</p>               |                                     |                                      | Y             |       |

| NO.  | VARNAM<br>E | QUESTIONS                                                                           | CODING CATEGORIES                                                                      | SKIPS/FILTERS | CORE/SU<br>PPEME<br>NT/OPTI<br>ONAL | AKAIS<br>ONLY | NOTES |
|------|-------------|-------------------------------------------------------------------------------------|----------------------------------------------------------------------------------------|---------------|-------------------------------------|---------------|-------|
| 1017 |             | If you have a choice, would you like to receive medication as an injection or pill? | INJECTION = 1<br>PILL = 2<br>NO PREFERENCE = 3<br>DON'T KNOW = 98<br>REFUSED TO SAY=99 |               |                                     | Y             |       |

**MODULE 11: NON-PRESCRIPTION DRUG USE/ALCOHOL USE**

| NO.  | VARNAME | QUESTIONS                                                                              | CODING CATEGORIES                                                                                                                                       | SKIPS/FILTERS                  | CORE/SUPPLEMENT/OPTIONAL | AKAIS ONLY | NOTES |
|------|---------|----------------------------------------------------------------------------------------|---------------------------------------------------------------------------------------------------------------------------------------------------------|--------------------------------|--------------------------|------------|-------|
| 1101 |         | How often do you have a drink containing alcohol?                                      | NEVER = 1<br>MONTHLY OR LESS = 2<br>2-4 TIMES A MONTH =3<br>2-3 TIMES A WEEK = 4<br>4 OR MORE TIMES A WEEK = 5<br>DON'T KNOW = 98<br>RESFUSED TO SAY=99 | IF NEVER, DK,<br>RESFUSED→1104 |                          |            |       |
| 1102 |         | How many drinks containing alcohol do you have on a typical day when you are drinking? | 1 OR 2= 1<br>3 OR 4= 2<br>5 OR 6 =3<br>7 TO 9 = 4<br>10 OR MORE = 5<br>DON'T KNOW = 98<br>RESFUSED TO SAY=99                                            |                                | 0                        |            |       |
| 1103 |         | On one occasion, how often do you have six or more drinks?                             | NEVER = 1<br>LESS THAN MONTHLY = 2<br>MONTHLY = 3<br>WEEKLY = 4<br>DAILY OR ALMOST DAILY = 5<br>DON'T KNOW = 98<br>RESFUSED TO SAY=99                   |                                | 0                        |            |       |

| NO.  | VARNAME | QUESTIONS                                                                                                          | CODING CATEGORIES                                                                                                                                                                                                                                                                                                         | SKIPS/FILTERS                                     | CORE/SUPPLEMENT/OPTIONAL | AKAIS ONLY | NOTES |
|------|---------|--------------------------------------------------------------------------------------------------------------------|---------------------------------------------------------------------------------------------------------------------------------------------------------------------------------------------------------------------------------------------------------------------------------------------------------------------------|---------------------------------------------------|--------------------------|------------|-------|
| 1104 |         | <p>In the past 12 months which of the following substances have you used to get high?</p> <p>READ OUT ALOUD</p>    | <p>COCAINE 1<br/> HEROINE=2<br/> INDIAN HEMP=3<br/> TRANQUILIZERS=4<br/> CODEINE=5<br/> SNIFFING PETROL=6<br/> SNIFFING TOBACCO=7<br/> SNIFFING BURNING RUBBER=8<br/> SNIFING GUM=9<br/> INHALING SEWAGE/ GUTTERS=10<br/> NEVER USED=11<br/> OTHER (SPECIFY) = 96</p> <hr/> <p>DON'T KNOW = 98<br/> REFUSED TO SAY=99</p> |                                                   |                          | Y          |       |
| 1105 |         | <p>Some people inject drugs with a needle and syringe for pleasure. Have you ever injected drugs for pleasure?</p> | <p>YES = 1<br/> NO = 2<br/> DON'T KNOW = 98<br/> REFUSED TO SAY=99</p>                                                                                                                                                                                                                                                    | <p>IF NO, DK,<br/> REGUSED END<br/> INTERVIEW</p> | O                        |            |       |
| 1106 |         | <p>Have you injected drugs with a needle and syringe in the past 3 months?</p>                                     | <p>YES = 1<br/> NO = 2<br/> DON'T KNOW = 98<br/> REFUSED TO SAY=99</p>                                                                                                                                                                                                                                                    | <p>IF NO, DK,<br/> REGUSED END<br/> INTERVIEW</p> | O                        |            |       |



| NO.  | VARNAME | QUESTIONS                                                                                                       | CODING CATEGORIES                                          | SKIPS/FILTERS                          | CORE/SUPPLEMENT/OPTIONAL | AKAIS ONLY | NOTES |
|------|---------|-----------------------------------------------------------------------------------------------------------------|------------------------------------------------------------|----------------------------------------|--------------------------|------------|-------|
| 1107 |         | When you have injected drugs during the last 3 months, have you shared the syringe or needle with other people? | YES = 1<br>NO = 2<br>DON'T KNOW = 98<br>RESFUSED TO SAY=99 | IF NO, DK,<br>REFUSED END<br>INTERVIEW | O                        |            |       |
| 1108 |         | Did you know the HIV status of everyone with whom you were sharing needles?                                     | YES = 1<br>NO = 2<br>DON'T KNOW = 98<br>RESFUSED TO SAY=99 | END<br>INTERVIEW                       |                          | Y          |       |
