# Supplementary material for: Correlates of uptake of HIV testing among children and young adolescents in Akwa-Ibom state, Nigeria: a secondary data analysis of the Akwa-Ibom aids indicator survey, 2017
Source: Springer Nature journal article supplement (doi:10.1186/s12887-021-02495-5), 2021-01-12
Supplement: MOESM2 [file 18762214]

## AKAIS Adolescent Individual Questionnaire

---

### Contents

|                                                                                     |    |
|-------------------------------------------------------------------------------------|----|
| CONSENT AND ELIGIBILITY CHECK.....                                                  | 2  |
| MODULE 1: SOCIO-DEMOGRAPHIC CHARACTERISTICS.....                                    | 6  |
| MODULE 2: HIV KNOWLEDGE.....                                                        | 9  |
| MODULE 3: HIV PREVENTION INTERVENTIONS .....                                        | 11 |
| MODULE 4: SEXUAL BEHAVIOR .....                                                     | 12 |
| MODULE 5: HIV RISK PERCEPTION .....                                                 | 16 |
| MODULE 6: SOCIAL NORMS, INTENTION TO ABSTAIN, SELF-EFFICACY AND ASSERTIVENESS ..... | 17 |
| MODULE 7: HIV TESTING .....                                                         | 18 |
| MODULE 8: HIV STIGMA .....                                                          | 19 |
| MODULE 9: ALCOHOL AND DRUGS .....                                                   | 20 |
| MODULE 10: PARENTAL SUPPORT .....                                                   | 21 |

**CONSENT AND ELIGIBILITY CHECK**

| NO. | VARNAME | QUESTIONS                                                                                                                                                                                                                                                        | CODING CATEGORIES | SKIPS/FILTERS     | CORE/SUPPLEMENT | AKAIS ONLY | NOTES |
|-----|---------|------------------------------------------------------------------------------------------------------------------------------------------------------------------------------------------------------------------------------------------------------------------|-------------------|-------------------|-----------------|------------|-------|
| 1   |         | FIRST NAME OF THE PARTICIPANT FROM HOUSEHOLD ROSTER<br><br>CONFIRM NAME WITH PARTICIPANT                                                                                                                                                                         | FIRST NAME: _____ |                   |                 |            |       |
| 2   |         | AGE OF PARTICIPANT FROM HOUSEHOLD ROSTER<br><br>ASK PARTICIPANT: "How old were you at your last birthday?"<br><br>Does (NAME) confirm their age at last birthday?<br><br><i>IF AGE DIFFERENT FROM HOUSEHOLD ROSTER, PLEASE VERIFY CORRECT AGE OF PARTICIPANT</i> | AGE: _____        | MUST BE 10-14 YRS |                 |            |       |
| 3   |         | SCAN BARCODE OF PARTICIPANT                                                                                                                                                                                                                                      |                   |                   |                 |            |       |

|   |  |                                                                                                                                                                                                |                                                                                                                                                                                                                                                                                                                                   |                  |   |  |  |
|---|--|------------------------------------------------------------------------------------------------------------------------------------------------------------------------------------------------|-----------------------------------------------------------------------------------------------------------------------------------------------------------------------------------------------------------------------------------------------------------------------------------------------------------------------------------|------------------|---|--|--|
| 4 |  | RECORD SEX OF THE RESPONDENT                                                                                                                                                                   | MALE = 1<br>FEMALE = 2                                                                                                                                                                                                                                                                                                            |                  | C |  |  |
| 5 |  | TO INTERVEIWER: FOLLOW THE NEXT STEPS<br>1) CONSENT (NAME)'S PARENT/GUARDAIN<br>2) ASSESS (NAME)'S ELIGIBILITY (LANGUAGE,<br>HEARING ABILITY, COGNITIVE ABILITY)<br>3) GAIN ASSENT FROM (NAME) |                                                                                                                                                                                                                                                                                                                                   |                  |   |  |  |
| 6 |  | FROM PARENTAL PERMISSION FORM:<br>TO THE PARENT/GUARDIAN<br><br>Did you give permission for (NAME) to take<br>part in this study?                                                              | YES = 1<br>NO = 2                                                                                                                                                                                                                                                                                                                 | IF YES → 8       |   |  |  |
| 7 |  | FOR PARENT/GUARDIAN:<br>What are the reasons that you do not want<br>(NAME) to participate in the survey?<br><br>DON'T READ OUT LOUD<br><br>PROBE<br><br>SELECT ALL THAT APPLY                 | NO TIME= 1<br>NOT COMFORTABLE WITH INTERVIEW= 2<br>DOESN'T LIKE QUESTIONS ON SEX= 3<br>DOESN'T LIKE BLOOD DRAW= 4<br>DOESN'T WANT TO GET RESULTS= 5<br>WORRIES ABOUT CONFIDENTIALITY= 6<br>DOESN'T WANT TO BE TESTED FOR HIV=7<br>ALREADY KNOWS HIV POSITIVE=8<br>OTHER (SPECIFY)=96<br><hr/> DON'T KNOW=98<br>REFUSES TO SAY= 99 | END<br>INTERVIEW |   |  |  |

|    |  |                                                                                                                      |                                                                                                                                                                                                                                                                                                                                             |               |  |  |  |
|----|--|----------------------------------------------------------------------------------------------------------------------|---------------------------------------------------------------------------------------------------------------------------------------------------------------------------------------------------------------------------------------------------------------------------------------------------------------------------------------------|---------------|--|--|--|
| 8  |  | FOR THE INTERVIEWER, DON'T READ OUT LOUD<br><br>Is this (NAME) eligible for the survey based on assessment (Step 2)? | YES = 1<br>NO = 2                                                                                                                                                                                                                                                                                                                           | IF YES →10    |  |  |  |
| 9  |  | Reason for ineligibility:                                                                                            | HEARING DISABILITY=1<br>DOES NOT SPEAK A LANGUAGE THE SURVEY TEAM CAN ACCOMMODATE=2<br>VISUAL IMPAIRMENT=3<br>COGNITIVE DISABILITY=4<br>OTHER=98 (SPECIFY)                                                                                                                                                                                  | END INTERVIEW |  |  |  |
| 10 |  | FROM ASSENT FORM:TO PARTICIPANT:<br><br>Did you agree to take part in this study?                                    | YES = 1<br>NO = 2                                                                                                                                                                                                                                                                                                                           | IF YES→12     |  |  |  |
| 11 |  | FOR PARTICIPANT:<br><br>What are the reason that you do not want to participate in the survey?                       | NO TIME= 1<br>NOT COMFORTABLE WITH INTERVIEW= 2<br>DOESN'T LIKE QUESTIONS ON SEX= 3<br>DOESN'T LIKE BLOOD DRAW= 4<br>DOESN'T WANT TO GET RESULTS OF HIV TEST= 5<br>WORRIES ABOUT CONFIDENTIALITY= 6<br>DOESN'T WANT TO BE TESTED FOR HIV=7<br>ALREADY KNOWS HIV POSITIVE=8<br>OTHER (SPECIFY)=96<br><br>DON'T KNOW=98<br>REFUSES TO SAY= 99 | END INTERVIEW |  |  |  |

|    |  |                                                       |                                                        |  |  |  |  |
|----|--|-------------------------------------------------------|--------------------------------------------------------|--|--|--|--|
| 12 |  | What Language do you prefer for our discussion today? | ENGLISH=1<br>ANNANG=2<br>IBIBIO=3<br>ORO=4<br>PIDGIN=5 |  |  |  |  |
|----|--|-------------------------------------------------------|--------------------------------------------------------|--|--|--|--|

## MODULE 1: SOCIO-DEMOGRAPHIC CHARACTERISTICS

| NO. | VARNAME | QUESTIONS                                                                 | CODING CATEGORIES                                                                                                                                                                                                                                                                                                                                                                                                                       | SKIPS/FILTERS               |
|-----|---------|---------------------------------------------------------------------------|-----------------------------------------------------------------------------------------------------------------------------------------------------------------------------------------------------------------------------------------------------------------------------------------------------------------------------------------------------------------------------------------------------------------------------------------|-----------------------------|
| 101 |         | Do you go currently to school?                                            | YES = 1<br>NO = 2<br>DON'T KNOW = 998<br>REFUSED TO SAY = 999                                                                                                                                                                                                                                                                                                                                                                           | IF NO, DK,<br>REFUSED → 105 |
| 102 |         | During the last school week, did you miss any school days for any reason? | YES = 1<br>NO = 2<br>DON'T KNOW = 998<br>REFUSED TO SAY = 999                                                                                                                                                                                                                                                                                                                                                                           | IF NO, DK,<br>REFUSED → 104 |
| 103 |         | Why did you miss school?<br><br>SELECT ALL THAT APPLY                     | I WAS SICK = 1<br>I DIDN'T FEEL SAFE GOING TO/WHILE IN SCHOOL = 2<br>MY PARENTS DIDN'T TAKE ME TO SCHOOL=3<br>I DON'T LIKE SCHOOL = 4<br>I HAD TO LOOK AFTER MY FAMILY= 5<br>THERE WAS NOT ENOUGH MONEY TO SEND ME TO SCHOOL = 6<br>SCHOOL IS TOO FAR AWAY = 7<br>I HAD TO WORK = 8<br>I HAD A CHILD OR I AM PREGNANT (GIRLS ONLY) = 9<br>I MISSED SCHOOL BECAUSE OF MY PERIOD (MENSTRUATION) (GIRLS ONLY) = 10<br>OTHER (SPECIFY) = 96 |                             |

| NO. | VARNAME | QUESTIONS                                                                                                                   | CODING CATEGORIES                                                                                                                                                                                                                      | SKIPS/FILTERS           |
|-----|---------|-----------------------------------------------------------------------------------------------------------------------------|----------------------------------------------------------------------------------------------------------------------------------------------------------------------------------------------------------------------------------------|-------------------------|
|     |         |                                                                                                                             | DON'T KNOW = 998<br>REFUSED TO SAY = 999                                                                                                                                                                                               |                         |
| 104 |         | What level of school are you currently in?                                                                                  | IN PRIMARY = 1<br>COMPLETED PRIMARY, NOT IN JSS = 2<br>COMPLETED PRIMARY, IN JSS = 3<br>COMPLETED JSS = 4<br>IN SSS = 5<br>COMPLETED SSS =6<br>QUARANIC SCHOOL=7<br>OTHER (SPECIFY)..... = 8<br>DON'T KNOW = 98<br>REFUSED TO SAY = 99 | GO TO 201 (NEXT MODULE) |
| 105 |         | When was the last time you regularly attended school?<br>Would you say it was less than a year ago or more than a year ago? | LESS THAN 1 YEAR = 1<br>1 YEAR OR LONGER = 2<br>DON'T KNOW = 998<br>REFUSED TO SAY = 999                                                                                                                                               |                         |
| 106 |         | Have you ever attended school?                                                                                              | YES = 1<br>NO = 2<br>DON'T KNOW = 998<br>REFUSED TO SAY = 999                                                                                                                                                                          | IF YES→108              |

| NO. | VARNAME | QUESTIONS                                                                                        | CODING CATEGORIES                                                                                                                                                                                                                                                                                                                                                                                                                                       | SKIPS/FILTERS |
|-----|---------|--------------------------------------------------------------------------------------------------|---------------------------------------------------------------------------------------------------------------------------------------------------------------------------------------------------------------------------------------------------------------------------------------------------------------------------------------------------------------------------------------------------------------------------------------------------------|---------------|
| 107 |         | <p>What is the <b>main</b> reason you never attended school?</p> <p>SELECT ONLY ONE RESPONSE</p> | <p>I HAVE BEEN SICK = 1<br/> I DON'T FEEL SAFE GOING TO/WHILE IN SCHOOL = 2<br/> MY PARENTS DON'T TAKE ME TO SCHOOL = 3<br/> I DON'T LIKE SCHOOL = 4<br/> I HAVE TO LOOK AFTER MY FAMILY = 5<br/> THERE'S NOT ENOUGH MONEY TO SEND ME TO SCHOOL = 6<br/> SCHOOL IS TOO FAR AWAY = 7<br/> I HAVE TO WORK = 8<br/> I HAVE A CHILD OR I AM PREGNANT (GIRLS ONLY) = 9<br/> OTHER (SPECIFY) = 96</p> <hr/> <p>DON'T KNOW = 998<br/> REFUSED TO SAY = 999</p> | END MODULE    |
| 108 |         | <p>What is the highest level of school that you have completed?</p>                              | <p>NURSERY/KINDERGARTEN = 1<br/> SOME PRIMARY = 2<br/> COMPLETED PRIMARY, NOT IN JSS = 3<br/> COMPLETED PRIMARY, IN JSS = 4<br/> SOME JSS=5<br/> COMPLETED JSS = 6<br/> SOME SSS = 7<br/> COMPLETED SSS =8<br/> QUARANIC SCHOOL=9<br/> ISLAMIYYA=10<br/> OTHER (SPECIFY) = 96</p> <hr/> <p>DON'T KNOW = 998</p>                                                                                                                                         |               |

| NO. | VARNAME | QUESTIONS | CODING CATEGORIES    | SKIPS/FILTERS |
|-----|---------|-----------|----------------------|---------------|
|     |         |           | REFUSED TO SAY = 999 |               |

## MODULE 2: HIV KNOWLEDGE

READ: Now I would like to ask you some questions about what you know about some things related to health.

| NO. | VARNAME | QUESTIONS                                                     | CODING CATEGORIES                                                                                                                                                                                        | SKIPS/FILTERS               |
|-----|---------|---------------------------------------------------------------|----------------------------------------------------------------------------------------------------------------------------------------------------------------------------------------------------------|-----------------------------|
| 201 |         | Have you heard of a disease called HIV/AIDS?                  | YES = 1<br>NO = 2<br>DON'T KNOW = 998<br>REFUSED TO SAY = 999                                                                                                                                            | IF NO, DK,<br>REFUSED → 302 |
| 202 |         | How did you hear about HIV/AIDS?<br><br>SELECT ALL THAT APPLY | SCHOOLS/TEACHERS = 1<br>PARENTS/GUARDIAN = 2<br>OTHER FAMILY MEMBERS = 3<br>FRIENDS/PEERS = 4<br>RELIGIOUS LEADERS = 5<br>INTERNET = 6<br>MOBILE PHONE = 7<br>HOSPITAL/CLINIC = 8<br>TELEVISION/FILM = 9 |                             |

|     |  |                                                                             |                                                                                                                                                                                                                              |  |
|-----|--|-----------------------------------------------------------------------------|------------------------------------------------------------------------------------------------------------------------------------------------------------------------------------------------------------------------------|--|
|     |  |                                                                             | RADIO = 10<br>HEALTH WORKERS = 11<br>OTHER (SPECIFY) = 96<br><hr/> DON'T KNOW = 998<br>REFUSED TO SAY = 999                                                                                                                  |  |
| 203 |  | Have you <u>ever</u> discussed HIV or AIDS with your parents or guardian?   | YES = 1<br>NO = 2<br>DON'T KNOW = 998<br>REFUSED TO SAY = 999                                                                                                                                                                |  |
| 204 |  | Can a healthy looking person have HIV?                                      | YES = 1<br>NO = 2<br>DON'T KNOW = 998<br>REFUSED TO SAY = 999                                                                                                                                                                |  |
| 205 |  | How can HIV be transmitted?<br><br>SELECT ALL THAT APPLY                    | UNPROTECTED SEX WITH AN INFECTED PERSON = 1<br>SHARING SHARP OBJECTS = 2<br>CONTACT WITH BLOOD = 3<br>BLOOD TRANSFUSION = 4<br>MOTHER TO CHILD = 5<br>OTHER (SPECIFY) = 96<br><hr/> DON'T KNOW = 998<br>REFUSED TO SAY = 999 |  |
| 206 |  | Are there medicines that people with HIV can take to help them live longer? | YES = 1                                                                                                                                                                                                                      |  |

|  |  |  |                                                    |  |
|--|--|--|----------------------------------------------------|--|
|  |  |  | NO = 2<br>DON'T KNOW = 998<br>REFUSED TO SAY = 999 |  |
|--|--|--|----------------------------------------------------|--|

### MODULE 3: HIV PREVENTION INTERVENTIONS

| NO. | VARNAME | QUESTIONS                                                                                                | CODING CATEGORIES                                                                                                                                                                             | SKIPS/FILTERS                             |
|-----|---------|----------------------------------------------------------------------------------------------------------|-----------------------------------------------------------------------------------------------------------------------------------------------------------------------------------------------|-------------------------------------------|
| 301 |         | How can someone protect himself/herself from HIV?<br><br>DON'T READ OPTIONS<br><br>SELECT ALL THAT APPLY | NOT HAVING SEX = 1<br>USING CONDOM = 2<br>NOT SHARING SHARP OBJECTS = 3<br>NOT HAVING CONTACT WITH BLOOD = 4<br>OTHER (SPECIFY) = 96<br><br>_____<br>DON'T KNOW = 998<br>REFUSED TO SAY = 999 |                                           |
| 302 |         | Have you ever heard of condoms?                                                                          | YES = 1<br>NO = 2<br>REFUSED TO SAY = 999                                                                                                                                                     | IF NO, REFUSED TO SAY → 401 (NEXT MODULE) |
| 303 |         | What is it used for?<br><br>SELECT ALL THAT APPLY                                                        | PREVENTION OF PREGNANCY = 1<br>PREVENTION OF HIV = 2<br>PREVENTION OF OTHER INFECTIONS THAT CAN BE TRANSMITTED THROUGH SEX = 3<br>OTHER (SPECIFY) = 96                                        |                                           |

| NO. | VARNAME | QUESTIONS | CODING CATEGORIES                                 | SKIPS/FILTERS |
|-----|---------|-----------|---------------------------------------------------|---------------|
|     |         |           | _____<br>DON'T KNOW = 998<br>REFUSED TO SAY = 999 |               |

#### MODULE 4: SEXUAL BEHAVIOR

QUESTIONS 401-703 (MODULES 4-7) ARE ONLY FOR CHILDREN AGED 12-14 YEARS. CHECK AGE OF CHILD (QUESTION 2). IF CHILD IS 10-11 YEARS OLD, GO TO QUESTION 801 (MODULE 8).

READ: The next questions ask about sexual behavior. There are no right or wrong answers. Your responses will not be linked to you in any way or shared with anyone, including your parents.

PLEASE LOOK OUT FOR SIGNS OF DISTRESS IN CHILD WHEN ASKING THE FOLLOWING SEXUAL BEHAVIOR QUESTIONS. IF THE CHILD SEEMS DISTRESSED, ASK CHILD WHETHER HE/SHE WANTS TO CONTINUE. IF THE CHILD IS IN DISTRESS, DISCONTINUE AND MOVE TO THE NEXT MODULE.

TO MOVE TO THE NEXT SECTION, TOGGLE FROM THE RIGHT TOP CORNER OF THE TABLET, AND SCROLL DOWN TO THE NEXT MODULE.

| NO. | VARNAME | QUESTIONS                           | CODING CATEGORIES                                                                 | SKIPS/FILTERS |
|-----|---------|-------------------------------------|-----------------------------------------------------------------------------------|---------------|
| 401 |         | Have you ever been married?         | YES = 1<br>NO = 2<br>REFUSED TO SAY = 999                                         | IF NO → 403   |
| 402 |         | At what age were you first married? | AGE AT MARRIAGE (IN YEARS): ____ ____<br>DON'T KNOW = 998<br>REFUSED TO SAY = 999 | → 406         |

| NO. | VARNAME | QUESTIONS                                                                                             | CODING CATEGORIES                                                                                                                         | SKIPS/FILTERS                                                 |
|-----|---------|-------------------------------------------------------------------------------------------------------|-------------------------------------------------------------------------------------------------------------------------------------------|---------------------------------------------------------------|
| 403 |         | Have you ever heard of sex?                                                                           | YES = 1<br>NO = 2<br>DON'T KNOW = 998<br>REFUSED TO SAY = 999                                                                             | SKIP IF MARRIED<br><br>IF NO, DK,<br>REFUSED → NEXT<br>MODULE |
| 404 |         | Have you ever had sex?<br><br>By sex, we mean any sexual contact, that is, vaginal, oral or anal sex. | YES = 1<br>NO = 2<br>DON'T KNOW = 998<br>REFUSED TO SAY = 999                                                                             | IF NO, DK,<br>REFUSED → NEXT<br>MODULE                        |
| 405 |         | How did you do it?<br><br>DON'T READ OPTIONS<br><br>SELECT ALL THAT APPLY                             | VAGINAL SEX = 1<br>ORAL SEX = 2<br>ANAL SEX = 3<br>REFUSED TO SAY = 999                                                                   |                                                               |
| 406 |         | How old were you when you had sex for the first time?                                                 | AGE IN YEARS: __ __<br><br>DON'T KNOW = 998<br>REFUSED TO SAY = 999                                                                       |                                                               |
| 407 |         | What was the <b>main</b> reason that you had sex for the first time?<br><br>DO NOT READ OUT LOUD      | IT JUST HAPPENED = 1<br>MY FRIENDS PRESSURED ME TO HAVE SEX = 2<br>TO PROVE MY LOVE/TO FEEL LOVED = 3<br>I WANTED TO HAVE SEX/CURIOUS = 4 |                                                               |

| NO. | VARNAME | QUESTIONS                                                                                      | CODING CATEGORIES                                                                                                                                                                                                         | SKIPS/FILTERS                                                                 |
|-----|---------|------------------------------------------------------------------------------------------------|---------------------------------------------------------------------------------------------------------------------------------------------------------------------------------------------------------------------------|-------------------------------------------------------------------------------|
|     |         | SELECTED ONLY ONE RESPONSE                                                                     | MY BOYFRIEND/GIRLFRIEND WANTED TO HAVE SEX = 5<br>I WAS TRICKED, THREATENED OR FORCED = 6<br>FOR MONEY/GIFTS = 7<br>I WANTED TO HAVE A BABY = 8<br>OTHER (SPECIFY) = 96<br><hr/> DON'T KNOW = 998<br>REFUSED TO SAY = 999 |                                                                               |
| 408 |         | How old was the first person you had sex with?<br>Were they older, younger or same age as you? | OLDER THAN ME = 1<br>SAME AGE AS ME = 2<br>YOUNGER THAN ME = 3<br>DON'T KNOW = 998<br>REFUSED TO SAY = 999                                                                                                                |                                                                               |
| 409 |         | Did you use a condom the <u>first</u> time you had sex?                                        | YES = 1<br>NO = 2<br>DON'T KNOW = 998<br>REFUSED TO SAY = 999                                                                                                                                                             | IF NO, REFUSED TO SAY (FROM 409)<br>OR NEVER HEARD OF CONDOM (FROM 302) → 412 |
| 410 |         | The <u>last</u> time you had sex, was a condom used?                                           | YES = 1<br>NO = 2<br>DON'T KNOW = 998                                                                                                                                                                                     |                                                                               |

| NO. | VARNAME | QUESTIONS                                                                                                                                                                                                          | CODING CATEGORIES                                                                                                      | SKIPS/FILTERS |
|-----|---------|--------------------------------------------------------------------------------------------------------------------------------------------------------------------------------------------------------------------|------------------------------------------------------------------------------------------------------------------------|---------------|
|     |         |                                                                                                                                                                                                                    | REFUSED TO SAY = 999                                                                                                   |               |
| 411 |         | <p>How often do you use a condom during sex: Always, Sometimes, Never?<br/>By sex, we mean vaginal, oral or anal sex.</p>                                                                                          | <p>ALWAYS = 1<br/>SOMETIMES = 2<br/>NEVER = 3<br/>DON'T REMEMBER = 4<br/>DON'T KNOW = 998<br/>REFUSED TO SAY = 999</p> |               |
| 412 |         | <p>How many different people have you ever had sex with?<br/><br/>CAN NOT BE ZERO</p>                                                                                                                              | <p>NUMBER OF PARTNERS: ____<br/>DON'T KNOW = 998<br/>REFUSED TO SAY = 999</p>                                          |               |
| 413 |         | <p>Sometimes people have sex to get material support.<br/>Material support means helping you to pay for things or giving you gifts or money.<br/><br/>Have you ever had sex with someone for material support?</p> | <p>YES = 1<br/>NO = 2<br/>DON'T KNOW = 998<br/>REFUSED TO SAY TO SAY = 999</p>                                         |               |
| 414 |         | <p>Have you ever been pregnant?<br/><br/>GIRLS ONLY</p>                                                                                                                                                            | <p>YES = 1<br/>NO = 2<br/>DON'T KNOW = 998<br/>REFUSED TO SAY = 999</p>                                                |               |

| NO. | VARNAME | QUESTIONS                                                        | CODING CATEGORIES                                             | SKIPS/FILTERS |
|-----|---------|------------------------------------------------------------------|---------------------------------------------------------------|---------------|
| 415 |         | Have you <u>ever</u> talked with a parent or guardian about sex? | YES = 1<br>NO = 2<br>DON'T KNOW = 998<br>REFUSED TO SAY = 999 |               |

## MODULE 5: HIV RISK PERCEPTION

IF RESPONDENT HAS NOT HEARD OF HIV, DON'T KNOW, OR REFUSED (QUESTION 201), GO TO QUESTION 601 (NEXT MODULE).

| NO. | VARNAME | QUESTIONS                                                                                        | CODING CATEGORIES                                                                                                                                                                                                                                                          | SKIPS/FILTERS                                                           |
|-----|---------|--------------------------------------------------------------------------------------------------|----------------------------------------------------------------------------------------------------------------------------------------------------------------------------------------------------------------------------------------------------------------------------|-------------------------------------------------------------------------|
| 501 |         | How likely do you think is it that you can get HIV: Very Likely, Somewhat Likely, or Not Likely? | VERY LIKELY = 1<br>SOMEWHAT LIKELY = 2<br>NOT LIKELY = 3<br>I ALREADY HAVE HIV = 4<br>DON'T KNOW = 998<br>REFUSED TO SAY = 999                                                                                                                                             | IF NOT LIKELY → 503<br><br>IF HAVE HIV, DK, REFUSED → 601 (NEXT MODULE) |
| 502 |         | What is the <u>main</u> reason you think you are likely to get HIV?<br><br>DON'T READ ALOUD      | I HAVE HAD SEX WITHOUT A CONDOM = 1<br>I HAVE OR HAD MANY BOYFRIENDS/GIRLFRIENDS = 2<br>I HAVE HAD BLOOD TRANSFUSIONS = 3<br>MY MOTHER/FATHER HAS HIV = 4<br>I DON'T TRUST MY BOYFRIEND/GIRLFRIEND = 5<br>I AM SICK = 6<br>MY BOYFRIEND/GIRLFRIEND IS SICK OR HAS DIED = 7 | ALL → 601 (NEXT MODULE)                                                 |

|     |  |                                                                                                                                      |                                                                                                                                                                                  |  |
|-----|--|--------------------------------------------------------------------------------------------------------------------------------------|----------------------------------------------------------------------------------------------------------------------------------------------------------------------------------|--|
|     |  | PROBE FOR MAIN REASON                                                                                                                | OTHER (SPECIFY) = 96<br>_____<br>DON'T KNOW = 998<br>REFUSED TO SAY = 999                                                                                                        |  |
| 503 |  | What is the <u>main</u> reason you think you are not likely to get HIV?<br><br>DON'T READ ANSWERS ALOUD<br><br>PROBE FOR MAIN REASON | I DO NOT HAVE SEX = 1<br>I USE CONDOMS = 2<br>I HAVE ONLY ONE PARTNER = 3<br>I TRUST MY PARTNER = 4<br>OTHER (SPECIFY) = 96<br>_____<br>DON'T KNOW = 998<br>REFUSED TO SAY = 999 |  |

## MODULE 6: SOCIAL NORMS, INTENTION TO ABSTAIN, SELF-EFFICACY AND ASSERTIVENESS

IF RESPONDENT HAS NOT HEARD OF SEX, DON'T KNOW, OR REFUSED (QUESTION 401), GO TO QUESTION 701 (NEXT MODULE).

| NO. | VARNAME | QUESTIONS                                             | CODING CATEGORIES                                                                                    | SKIPS/FILTERS                 |
|-----|---------|-------------------------------------------------------|------------------------------------------------------------------------------------------------------|-------------------------------|
| 601 |         | How many of your friends do you think are having sex? | ALL = 1<br>MOST = 2<br>SOME = 3<br>A FEW = 4<br>NONE = 5<br>DON'T KNOW = 998<br>REFUSED TO SAY = 999 | SKIP IF MARRIED<br>(from 401) |

|     |  |                                                                                                               |                                                               |  |
|-----|--|---------------------------------------------------------------------------------------------------------------|---------------------------------------------------------------|--|
| 602 |  | Are you pressured by your friends or boyfriend/girlfriend to have sex?                                        | YES = 1<br>NO = 2<br>DON'T KNOW = 998<br>REFUSED TO SAY = 999 |  |
| 603 |  | If you did not want to have sex with someone, could you tell them that you do not want to have sex with them? | YES = 1<br>NO = 2<br>DON'T KNOW = 998<br>REFUSED TO SAY = 999 |  |

## MODULE 7: HIV TESTING

IF RESPONDENT HAS NOT HEARD OF HIV, DON'T KNOW, OR REFUSED (QUESTION 201), GO TO QUESTION 801 (NEXT MODULE).

READ: I would now like to ask you some questions about HIV testing.

| NO. | VARNAME | QUESTIONS                                             | CODING CATEGORIES                                             | SKIPS/FILTERS                                |
|-----|---------|-------------------------------------------------------|---------------------------------------------------------------|----------------------------------------------|
| 701 |         | Have you ever been tested for HIV?                    | YES = 1<br>NO = 2<br>DON'T KNOW = 998<br>REFUSED TO SAY = 999 | IF NO, DK, REFUSED<br>→ 801 (NEXT<br>MODULE) |
| 702 |         | Did you receive the results of any of your HIV tests? | YES = 1<br>NO = 2                                             |                                              |

|     |  |                                       |                                                                                                       |                                              |
|-----|--|---------------------------------------|-------------------------------------------------------------------------------------------------------|----------------------------------------------|
|     |  |                                       | DON'T KNOW = 998<br>REFUSED TO SAY = 999                                                              | IF NO, DK, REFUSED<br>→ 801 (NEXT<br>MODULE) |
| 703 |  | What was the result of that HIV test? | HIV POSITIVE = 1<br>HIV NEGATIVE = 2<br>INDETERMINATE = 3<br>DON'T KNOW = 998<br>REFUSED TO SAY = 999 |                                              |

## MODULE 8: HIV STIGMA

IF RESPONDENT HAS NOT HEARD OF HIV, DON'T KNOW, OR REFUSED (QUESTION 201), GO TO QUESTION 901 (NEXT MODULE).

READ: I would now like to ask you some questions about how you feel about people with HIV.

|     | VARNAME | QUESTIONS                                                    | CODING CATEGORIES                                             | SKIPS/FILTERS |
|-----|---------|--------------------------------------------------------------|---------------------------------------------------------------|---------------|
| 801 |         | Would you be willing to share food with someone who has HIV? | YES = 1<br>NO = 2<br>DON'T KNOW = 998<br>REFUSED TO SAY = 999 |               |

|     |  |                                          |                                                               |  |
|-----|--|------------------------------------------|---------------------------------------------------------------|--|
| 802 |  | Would you play with someone who has HIV? | YES = 1<br>NO = 2<br>DON'T KNOW = 998<br>REFUSED TO SAY = 999 |  |
|-----|--|------------------------------------------|---------------------------------------------------------------|--|

## MODULE 9: ALCOHOL AND DRUGS

READ: I would like to ask you some questions about alcohol and drugs or substances that you may have taken that were not given to you by a doctor. Your answers will not be told to anyone, not even your parents.

| NO. | VARNAME | QUESTIONS                                                                                     | CODING CATEGORIES                                                | SKIPS/FILTERS               |
|-----|---------|-----------------------------------------------------------------------------------------------|------------------------------------------------------------------|-----------------------------|
| 901 |         | Have you ever taken alcohol?                                                                  | YES = 1<br>NO = 2<br>DON'T KNOW = 998<br>REFUSED TO SAY = 999    | IF NO, DK, REFUSED<br>→ 903 |
| 902 |         | During the past 1 month, on how many days did you have at least one drink containing alcohol? | NUMBER OF DAYS: ____<br>DON'T KNOW = 998<br>REFUSED TO SAY = 999 | MAX = 31                    |

|     |  |                                                                                                                        |                                                                                                                                                                                                                                                                                                     |                                               |
|-----|--|------------------------------------------------------------------------------------------------------------------------|-----------------------------------------------------------------------------------------------------------------------------------------------------------------------------------------------------------------------------------------------------------------------------------------------------|-----------------------------------------------|
| 903 |  | Have you ever tried any substances to make you high?                                                                   | YES = 1<br>NO = 2<br>DON'T KNOW = 998<br>REFUSED TO SAY = 999                                                                                                                                                                                                                                       | IF NO, DK, REFUSED<br>→ 1001 (NEXT<br>MODULE) |
| 904 |  | What substances/drugs have you ever tried to make you high?<br><br>DO NOT READ RESPONSES, PROBE FOR MULTIPLE RESPONSES | COCAINE = 1<br>HEROINE = 2<br>INDIAN HEMP = 3<br>TRANQUILIZERS = 4<br>CODEINE = 5<br>SNIFFING PETROL = 6<br>SNIFFING TOBACCO = 7<br>SNIFFING BURNING RUBBER = 8<br>SNIFING GUM = 9<br>INHALING SEWAGE/GUTTERS = 10<br>OTHER (SPECIFY) = 96<br><br>_____<br>DON'T KNOW = 998<br>REFUSED TO SAY = 999 |                                               |

## MODULE 10: PARENTAL SUPPORT

READ: Finally, I would like to ask you some questions about your relationship with your parents/guardian.

| NO.  | VARNAME | QUESTIONS                                                                                                        | CODING CATEGORIES                                                                                                   | SKIPS/FILTERS |
|------|---------|------------------------------------------------------------------------------------------------------------------|---------------------------------------------------------------------------------------------------------------------|---------------|
| 1001 |         | Do your parents/guardians understand your problems and worries?                                                  | ALWAYS = 1<br>MOST OF THE TIME = 2<br>SOMETIMES = 3<br>RARELY = 4<br>NEVER = 5<br>DON'T KNOW = 998<br>REFUSED = 999 |               |
| 1002 |         | Do your parents/guardians really know what you are doing with your free time when you are not at school or work? | ALWAYS = 1<br>MOST OF THE TIME = 2<br>SOMETIMES = 3<br>RARELY = 4<br>NEVER = 5<br>DON'T KNOW = 998<br>REFUSED = 999 |               |
